# Supplementary material for: Facile synthesis of 5H-benzo[b]carbazol-6-yl ketones via sequential reaction of Cu-catalyzed Friedel–Crafts alkylation, iodine-promoted cyclization, nucleophilic substitution and aromatization
Source: Royal Society of Chemistry journal article supplement (doi:10.1039/c4ob00815d), 2014-01-01

**Facile Synthesis of 5*H*-Benzo[*b*]carbazol-6-yl Ketones via  
Sequential Reaction of Cu-Catalyzed Friedel-Crafts  
Alkylation/Iodine-Promoted Cyclization/Nucleophilic  
Substitution/Aromatization**

**Supplementary Information**

Jing Wu, Dongping Wang, Haolong Wang, Fan Wu, Xincheng Li, and

Boshun Wan\*

*Dalian Institute of Chemical Physics, Chinese Academy of Sciences,  
457 Zhongshan Road, Dalian 116023, China.  
E-mail: bswan@dicp.ac.cn*

**Table of Contents**

|                                                                                          |         |
|------------------------------------------------------------------------------------------|---------|
| 1. Experimental section.....                                                             | S1-S8   |
| 2. NMR Spectra ( <sup>1</sup> H, <sup>13</sup> C) .....                                  | S9-S38  |
| 3. X-ray structure of <b>5</b> .....                                                     | S39-S41 |
| 4. TIC spectrum and MS spectrum of five substances with molecule<br>weight of 591.1..... | S42-S47 |

**General Considerations.**  $^1\text{H}$  NMR and  $^{13}\text{C}$  NMR spectra were recorded on Bruker DRX-400 spectrometers (100 MHz for  $^{13}\text{C}$  NMR) using  $\text{CDCl}_3$  as solvent. Tetramethylsilane ( $\delta = 0$ ) or  $\text{CDCl}_3$  ( $\delta = 7.27$ ) serves as the internal standard for  $^1\text{H}$  NMR and  $\text{CDCl}_3$  (77.16 ppm) for  $^{13}\text{C}$  NMR. Coupling constants ( $J$ ) are reported in Hz and refer to apparent peak multiplications. The abbreviations *s*, *d*, *t*, *q*, and *m* stand for singlet, doublet, triplet, quartet, and multiplet in that order. HRMS data were obtained with micromass HPLC-Q-TOF mass spectrometer. Flash column chromatography was performed on silica gel (300–400 mesh). TLC analysis was performed using silica gel GF254 and visualized by fluorescence quenching under UV light.

Commercially available reagents were used throughout without further purification. All solvents were purified according to the standard procedures.

**General Procedure for the Asymmetric Friedel-Crafts Alkylation Reaction:**

In a 25 mL Schlenk tube bis(sulfonamide)-diamine ligand **6** (13 mg, 0.0165 mmol, 5.5 mol%) and  $\text{Cu}(\text{OTf})_2$  (5.4 mg, 0.015 mmol, 5 mol%) were dissolved in *i*-BuOH (1 mL), and the mixture was stirred at room temperature for 2 h to give the catalyst. After putting it into a freezer with the temperature of 0 °C, this mixture was added 2-(2-(alkynyl)benzylidene) malonate (0.3 mmol, 1.0 equiv.). After stirred for 15 min, indole was added (0.3 mmol, 1.0 equiv.). The reaction was stirred at 0 °C and monitored by TLC. When the reaction was finished (about 6–24 h), the solvent was evaporated under reduced pressure. Then  $\text{CH}_3\text{CN}$  (1 mL) with  $\text{H}_2\text{O}$  (1.0 equiv.) and  $\text{I}_2$  (152mg, 2.0 equiv.) were added, the reaction was conducted at 50 °C and monitored

by TLC until finished (about 2h). Then the solvent was evaporated under reduced pressure and the crude residue was purified by column chromatography to afford the desired product.

*(5H-benzo[b]carbazol-6-yl)(phenyl)methanone (4a).*

Following the general procedure, the compound was obtained as yellow solid: 85 mg, 88% yield; mp 179–180 °C;  $R_f = 0.43$  (petroleum ether/EtOAc = 8/1);  $^1\text{H}$  NMR (400 MHz,  $\text{CDCl}_3$ )  $\delta$  9.41 (s, 1H), 8.69 (s, 1H), 8.19 (d,  $J = 7.7$  Hz, 1H), 8.05 (d,  $J = 8.2$  Hz, 1H), 7.74 (d,  $J = 7.4$  Hz, 2H), 7.68 (d,  $J = 8.6$  Hz, 1H), 7.55 (t,  $J = 7.4$  Hz, 1H), 7.49 (t,  $J = 7.6$  Hz, 1H), 7.39 (m, 4H), 7.32–7.20 (m, 2H);  $^{13}\text{C}$  NMR (101 MHz,  $\text{CDCl}_3$ )  $\delta$  198.1, 142.1, 141.4, 140.5, 132.8, 131.0, 129.9, 129.4, 128.8, 128.3, 128.1, 126.2, 126.1, 126.0, 124.3, 123.1, 122.7, 121.2, 120.4, 113.4, 111.0; HRMS (ESI,  $m/z$ ) Calculated for  $\text{C}_{23}\text{H}_{15}\text{NO}$   $[\text{M} + \text{H}]^+$  322.1226, found 322.1236.

*(9-methoxy-5H-benzo[b]carbazol-6-yl)(phenyl)methanone (4b).*

Following the general procedure, the compound was obtained as brown solid: 68 mg, 65% yield; mp 206 – 207 °C;  $R_f = 0.3$  (petroleum ether/EtOAc = 8/1);  $^1\text{H}$  NMR (400 MHz,  $\text{CDCl}_3$ )  $\delta$  9.31 (s, 1H), 8.55 (s, 1H), 8.13 (d,  $J = 7.7$  Hz, 1H), 7.71 (d,  $J = 7.3$  Hz, 2H), 7.60–7.48 (m, 2H), 7.44 (t,  $J = 7.5$  Hz, 1H), 7.41–7.30 (m, 4H), 7.24 (t,  $J = 7.4$  Hz, 1H), 6.96 (dd,  $J = 9.3, 2.6$  Hz, 1H), 3.90 (s, 3H);  $^{13}\text{C}$  NMR (101 MHz,  $\text{CDCl}_3$ )  $\delta$  198.0, 155.4, 142.2, 140.4, 140.0, 132.8, 129.9, 129.4, 128.7, 127.9, 127.4, 126.5, 126.4, 122.8, 122.5, 121.1, 120.1, 118.8, 113.8, 110.9, 107.0, 55.4; HRMS HRMS (ESI,  $m/z$ ) Calculated for  $\text{C}_{24}\text{H}_{17}\text{NO}_2$   $[\text{M} + \text{H}]^+$  352.1332, found 352.1348.

*(9-chloro-5H-benzo[b]carbazol-6-yl)(phenyl)methanone (4c).*

Following the general procedure, the compound was obtained as yellow solid: 83 mg, 78% yield; mp 208–209 °C;  $R_f = 0.35$  (petroleum ether/EtOAc = 8/1);  $^1\text{H}$  NMR (400 MHz,  $\text{CDCl}_3$ )  $\delta$  9.37 (s, 1H), 8.52 (s, 1H), 8.14 (d,  $J = 7.6$  Hz, 1H), 7.98 (s, 1H), 7.69 (d,  $J = 7.5$  Hz, 2H), 7.56 (t,  $J = 8.9$  Hz, 2H), 7.48 (t,  $J = 7.5$  Hz, 1H), 7.44–7.33 (m, 3H), 7.27 (t,  $J = 7.4$  Hz, 1H), 7.18 (d,  $J = 9.0$  Hz, 1H);  $^{13}\text{C}$  NMR (101 MHz,  $\text{CDCl}_3$ )  $\delta$  197.6, 142.2, 141.2, 140.2, 133.1, 129.9, 129.0, 128.9, 128.6, 128.5, 127.6, 127.5, 127.1, 126.6, 123.0, 122.3, 121.3, 120.6, 113.5, 111.1; HRMS (ESI,  $m/z$ ) Calculated for  $\text{C}_{23}\text{H}_{14}\text{ClNO}$   $[\text{M} + \text{H}]^+$  356.0837, found 356.0840.

*(9-fluoro-5H-benzo[b]carbazol-6-yl)(phenyl)methanone (4d).*

Following the general procedure, the compound was obtained as yellow solid: 72 mg, 71% yield; mp 209–210 °C;  $R_f = 0.35$  (petroleum ether/EtOAc = 8/1);  $^1\text{H}$  NMR (400 MHz,  $\text{CDCl}_3$ )  $\delta$  9.28 (s, 1H), 8.64 (s, 1H), 8.20 (d,  $J = 7.7$  Hz, 1H), 7.74 (d,  $J = 7.5$  Hz, 2H), 7.71–7.65 (m, 2H), 7.60 (t,  $J = 7.4$  Hz, 1H), 7.52 (t,  $J = 7.6$  Hz, 1H), 7.48–7.39 (m, 3H), 7.31 (t,  $J = 7.4$  Hz, 1H), 7.14–7.06 (m, 1H);  $^{13}\text{C}$  NMR (101 MHz,  $\text{CDCl}_3$ )  $\delta$  197.7, 158.7 (d,  $J_{\text{C-F}} = 243.8$  Hz), 142.3, 140.7 (d,  $J_{\text{C-F}} = 1.6$  Hz), 140.2, 133.1, 129.9, 128.86 (d,  $J_{\text{C-F}} = 8.5$  Hz), 128.85, 128.4, 128.1 (d,  $J_{\text{C-F}} = 8.4$  Hz), 127.8, 127.2, 123.0 (d,  $J_{\text{C-F}} = 5.2$  Hz), 122.2, 121.3, 120.4, 116.2 (d,  $J_{\text{C-F}} = 25.3$  Hz), 113.8, 111.8 (d,  $J_{\text{C-F}} = 20.3$  Hz), 111.0; HRMS (ESI,  $m/z$ ) Calculated for  $\text{C}_{23}\text{H}_{14}\text{FNO}$   $[\text{M} + \text{H}]^+$  340.1132, found 340.1136.

*(8-methyl-5H-benzo[b]carbazol-6-yl)(phenyl)methanone (4e).*

Following the general procedure, the compound was obtained as yellow solid: 60 mg, 60% yield; mp 199–200 °C;  $R_f = 0.37$  (petroleum ether/EtOAc = 8/1);  $^1\text{H}$  NMR (400

MHz, CDCl<sub>3</sub>) δ 9.34 (s, 1H), 8.63 (s, 1H), 8.16 (d, *J* = 7.4 Hz, 1H), 7.94 (d, *J* = 8.2 Hz, 1H), 7.75 (d, *J* = 7.2 Hz, 2H), 7.55 (m, 1H), 7.41 (m, 5H), 7.32–7.11 (m, 2H), 2.28 (s, 3H); <sup>13</sup>C NMR (101 MHz, CDCl<sub>3</sub>) δ 198.2, 142.0, 141.5, 140.5, 135.9, 132.7, 131.3, 129.9, 129.2, 128.7, 127.8, 126.7, 125.5, 125.4, 125.3, 124.1, 122.8, 121.0, 120.3, 112.9, 110.9, 22.2; HRMS (ESI, *m/z*) Calculated for C<sub>24</sub>H<sub>17</sub>NO [M + H]<sup>+</sup> 336.1383, found 336.1396.

*(5H-benzo[b]carbazol-6-yl)(p-tolyl)methanone (4f).*

Following the general procedure, the compound was obtained as yellow solid: 91 mg, 90% yield; mp 175–176 °C; R<sub>f</sub> = 0.4 (petroleum ether/EtOAc = 8/1); <sup>1</sup>H NMR (400 MHz, CDCl<sub>3</sub>) δ 9.26 (s, 1H), 8.68 (s, 1H), 8.18 (d, *J* = 7.7 Hz, 1H), 8.05 (d, *J* = 8.1 Hz, 1H), 7.73 (d, *J* = 8.5 Hz, 1H), 7.66 (d, *J* = 7.9 Hz, 2H), 7.47 (t, *J* = 7.6 Hz, 1H), 7.41–7.24 (m, 4H), 7.20 (d, *J* = 7.8 Hz, 2H), 2.41 (s, 3H); <sup>13</sup>C NMR (101 MHz, CDCl<sub>3</sub>) δ 197.7, 143.8, 142.1, 141.0, 137.6, 131.0, 130.2, 129.5, 129.3, 128.3, 128.0, 126.1, 126.1, 125.9, 123.8, 123.1, 122.7, 121.2, 120.3, 113.9, 111.0, 21.9; HRMS (ESI, *m/z*) Calculated for C<sub>24</sub>H<sub>17</sub>NO [M + H]<sup>+</sup> 336.1383, found 336.1392.

*(5H-benzo[b]carbazol-6-yl)(4-methoxyphenyl)methanone (4g).*

Following the general procedure, the compound was obtained as yellow solid: 64 mg, 61% yield; mp 160–161 °C; R<sub>f</sub> = 0.38 (petroleum ether/EtOAc = 8/1); <sup>1</sup>H NMR (400 MHz, CDCl<sub>3</sub>) δ 9.09 (s, 1H), 8.68 (s, 1H), 8.20 (d, *J* = 7.7 Hz, 1H), 8.07 (d, *J* = 7.9 Hz, 1H), 7.77 (d, *J* = 8.3 Hz, 3H), 7.48 (t, *J* = 7.4 Hz, 1H), 7.39–7.37 (m, 2H), 7.35–7.23 (m, 2H), 6.89 (d, *J* = 8.4 Hz, 2H), 3.86 (s, 3H); <sup>13</sup>C NMR (101 MHz, CDCl<sub>3</sub>) δ 196.6, 163.8, 142.2, 140.6, 132.7, 132.6, 130.9, 129.3, 128.3, 128.0, 126.1,

126.0, 125.9, 123.3, 123.1, 122.8, 121.2, 120.3, 114.2, 114.1, 110.9, 55.6; HRMS (ESI,  $m/z$ ) Calculated for  $C_{24}H_{17}NO_2$   $[M + H]^+$  352.1332, found 352.1335.

*(5H-benzo[b]carbazol-6-yl)(4-Chlorophenyl)methanone (4h).*

Following the general procedure, the compound was obtained as yellow solid: 99 mg, 93% yield; mp 204–205 °C;  $R_f$  = 0.53 (petroleum ether/EtOAc = 8/1);  $^1H$  NMR (400 MHz,  $CDCl_3$ )  $\delta$  9.49 (s, 1H), 8.66 (s, 1H), 8.16 (d,  $J$  = 7.5 Hz, 1H), 8.03 (d,  $J$  = 8.0 Hz, 1H), 7.64 (m, 3H), 7.48 (t,  $J$  = 7.4 Hz, 1H), 7.37 (m, 4H), 7.28 (t,  $J$  = 7.1 Hz, 2H);  $^{13}C$  NMR (101 MHz,  $CDCl_3$ )  $\delta$  196.7, 142.1, 141.6, 139.2, 138.8, 131.3, 130.8, 129.5, 129.1, 128.3, 128.2, 126.3, 126.1, 126.0, 124.6, 123.2, 122.6, 121.2, 120.5, 112.8, 111.1; HRMS (ESI,  $m/z$ ) Calculated for  $C_{23}H_{14}ClNO$   $[M + H]^+$  356.0837, found 356.0837.

*(4-chlorophenyl)(1-methoxy-5H-benzo[b]carbazol-6-yl)methanone (4i).*

Following the general procedure, the compound was obtained as yellow solid: 64 mg, 55% yield; mp 233–235 °C;  $R_f$  = 0.28 (petroleum ether/EtOAc = 8/1);  $^1H$  NMR (400 MHz,  $CDCl_3$ )  $\delta$  9.56 (s, 1H), 8.95 (s, 1H), 8.10 (d,  $J$  = 8.1 Hz, 1H), 7.72–7.60 (m, 3H), 7.48–7.34 (m, 4H), 7.30 (t,  $J$  = 7.5 Hz, 1H), 7.05 (d,  $J$  = 8.0 Hz, 1H), 6.78 (d,  $J$  = 8.1 Hz, 1H), 4.17 (s, 3H);  $^{13}C$  NMR (101 MHz,  $CDCl_3$ )  $\delta$  196.8, 157.0, 143.5, 141.3, 139.03, 139.00, 131.3, 130.3, 129.6, 129.2, 129.0, 128.8, 127.6, 125.9, 125.8, 125.4, 123.0, 112.3, 111.5, 103.9, 102.0, 55.7; HRMS (ESI,  $m/z$ ) Calculated for  $C_{24}H_{16}ClNO_2$   $[M + H]^+$  386.0942, found 386.0948.

*(4-chlorophenyl)(2-methyl-5H-benzo[b]carbazol-6-yl)methanone (4j).*

Following the general procedure, the compound was obtained as yellow solid: 107 mg,

96% yield; mp 205–206 °C;  $R_f = 0.3$  (petroleum ether/EtOAc = 8/1);  $^1\text{H}$  NMR (400 MHz,  $\text{CDCl}_3$ )  $\delta$  9.40 (s, 1H), 8.64 (s, 1H), 8.03 (d,  $J = 7.8$  Hz, 1H), 7.97 (s, 1H), 7.64–7.61 (m, 3H), 7.38–7.36 (d,  $J = 7.6$  Hz, 3H), 7.29 (m, 3H), 2.54 (s, 3H);  $^{13}\text{C}$  NMR (101 MHz,  $\text{CDCl}_3$ )  $\delta$  196.7, 142.0, 140.2, 139.1, 138.9, 131.3, 130.8, 123.0, 129.5, 129.4, 129.1, 128.21, 126.3, 126.04, 125.97, 124.5, 123.1, 122.8, 121.3, 112.7, 110.7, 21.5; HRMS (ESI,  $m/z$ ) Calculated for  $[\text{C}_{24}\text{H}_{16}\text{ClNO} + \text{H}]^+$  370.0993, found 370.0993.

*(4-chlorophenyl)(2-methoxy-5H-benzo[b]carbazol-6-yl)methanone (4k).*

Following the general procedure, the compound was obtained as yellow solid: 87 mg, 75% yield; mp 190–191 °C;  $R_f = 0.15$  (petroleum ether/EtOAc = 8/1);  $^1\text{H}$  NMR (400 MHz,  $\text{CDCl}_3$ )  $\delta$  9.39 (s, 1H), 8.63 (s, 1H), 8.02 (d,  $J = 8.0$  Hz, 1H), 7.71–7.56 (m, 4H), 7.41–7.32 (m, 3H), 7.31–7.21 (m, 2H), 7.10 (dd,  $J = 8.5, 1.7$  Hz, 1H);  $^{13}\text{C}$  NMR (101 MHz,  $\text{CDCl}_3$ )  $\delta$  196.6, 154.7, 142.2, 139.1, 138.9, 136.7, 131.3, 130.9, 129.5, 129.0, 128.0, 126.4, 126.1, 125.9, 124.7, 123.2, 123.0, 116.6, 112.7, 111.7, 104.8, 56.3; HRMS (ESI,  $m/z$ ) Calculated for  $\text{C}_{24}\text{H}_{16}\text{ClNO}_2$   $[\text{M} + \text{H}]^+$  386.0942, found 386.0942.

*(2-bromo-5H-benzo[b]carbazol-6-yl)(4-chlorophenyl)methanone (4l).*

Following the general procedure, the compound was obtained as yellow solid: 128 mg, 98% yield; mp 261 – 262 °C;  $R_f = 0.4$  (petroleum ether/EtOAc = 8/1);  $^1\text{H}$  NMR (400 MHz, DMSO)  $\delta$  11.29 (s, 1H), 9.02 (s, 1H), 8.57 (s, 1H), 8.15 (dd,  $J = 6.6, 2.7$  Hz, 1H), 7.76 (d,  $J = 8.4$  Hz, 2H), 7.66–7.53 (m, 4H), 7.51–7.37 (m, 3H);  $^{13}\text{C}$  NMR (101 MHz, DMSO)  $\delta$  195.4, 141.5, 138.7, 138.0, 136.6, 131.5, 130.1, 129.5, 129.2, 127.3, 126.4, 124.3, 124.0, 123.7, 122.9, 122.8, 114.2, 113.1, 111.2; HRMS (ESI,  $m/z$ )

Calculated for  $C_{23}H_{13}BrClNO$   $[M + H]^+$  433.9942, found 433.9944.

*(3-chloro-5H-benzo[b]carbazol-6-yl)(4-chlorophenyl)methanone (4m)*.

Following the general procedure, the compound was obtained as yellow solid: 89 mg, 76% yield; mp 199–201 °C;  $R_f = 0.5$  (petroleum ether/EtOAc = 8/1);  $^1H$  NMR (400 MHz,  $CDCl_3$ )  $\delta$  9.48 (s, 1H), 8.57 (s, 1H), 8.00 (d,  $J = 8.0$  Hz, 2H), 7.71–7.54 (m, 3H), 7.41–7.25 (m, 5H), 7.22 (d,  $J = 8.1$  Hz, 1H);  $^{13}C$  NMR (101 MHz,  $CDCl_3$ )  $\delta$  196.6, 142.7, 141.6, 139.4, 138.6, 133.8, 131.3, 130.76, 129.4, 129.1, 128.5, 126.3, 126.0, 125.4, 124.5, 123.5, 121.9, 121.2, 121.0, 113.2, 111.2; HRMS (ESI,  $m/z$ )

Calculated for  $C_{23}H_{13}Cl_2NO$   $[M + H]^+$  390.0447, found 390.0439.

*(4-chlorophenyl)(4-methyl-5H-benzo[b]carbazol-6-yl) methanone (4n)*.

Following the general procedure, the compound was obtained as yellow solid: 89 mg, 80% yield; mp 164–166 °C;  $R_f = 0.55$  (petroleum ether/EtOAc = 8/1);  $^1H$  NMR (400 MHz,  $CDCl_3$ )  $\delta$  9.41 (s, 1H), 8.66 (s, 1H), 8.03 (t,  $J = 7.6$  Hz, 2H), 7.66 (d,  $J = 8.4$  Hz, 2H), 7.62 (d,  $J = 8.6$  Hz, 1H), 7.42–7.34 (m, 3H), 7.33–7.25 (m, 2H), 7.21 (t,  $J = 7.7$  Hz, 1H), 2.53 (s, 3H);  $^{13}C$  NMR (101 MHz,  $CDCl_3$ )  $\delta$  196.9, 141.7, 141.3, 139.1, 139.0, 131.3, 130.8, 129.5, 129.1, 128.9, 128.4, 126.8, 126.1, 124.8, 123.2, 122.2, 120.7, 120.4, 118.7, 112.8, 16.9; HRMS (ESI,  $m/z$ ) Calculated for  $C_{24}H_{16}ClNO$   $[M + H]^+$  370.0993, found 370.0995.

*10-Chloro-6-cyclopropyl-7-iodo-5,12-dihydrobenzo[4,5]cyclohepta[1,2-b]indoleyl-1-2-diethyl malonate (5)*

The compound was obtained as brown oil: 177 mg, 41% yield;  $R_f = 0.2$  (petroleum ether/EtOAc = 8/1);  $^1H$  NMR (400 MHz,  $CDCl_3$ )  $\delta$  8.18 (s, 1H), 7.87–7.71 (m, 2H),



7.32–7.23 (m, 2H), 7.21–7.16 (m, 1H), 7.16–7.10 (m, 2H), 5.04 (d,  $J = 11.6$  Hz, 1H), 4.12–3.95 (m, 2H), 3.76 (m, 3H), 2.08–1.94 (m, 1H), 1.35–1.24 (m, 1H), 1.19–1.11 (m, 1H), 1.11–1.03 (m, 3H), 0.87–0.79 (m, 4H), 0.73–0.60 (m, 1H);  $^{13}\text{C}$  NMR (101 MHz,  $\text{CDCl}_3$ )  $\delta$  167.9, 167.2, 141.3, 139.2, 137.2, 136.5, 135.0, 130.7, 128.4, 126.1, 125.8, 123.6, 120.3, 118.8, 117.5, 110.9, 107.9, 61.6, 61.4, 50.9, 42.0, 24.3, 14.0, 13.7, 11.1, 10.7. HRMS (ESI,  $m/z$ ) Calculated for  $\text{C}_{27}\text{H}_{26}\text{ClINO}_4$   $[\text{M} + \text{H}]^+$  590.0590, found 590.0580.

*(5H-benzo[b]carbazol-6-yl)(phenyl)methanone with  $\text{O}^{18}$  label (4a').*

HRMS (ESI,  $m/z$ ) Calculated for  $\text{C}_{23}\text{H}_{15}\text{NO}^{18}$   $[\text{M} + \text{H}]^+$  324.1269, found 324.1278

# 1. NMR Spectra ( $^1\text{H}$ , $^{13}\text{C}$ )

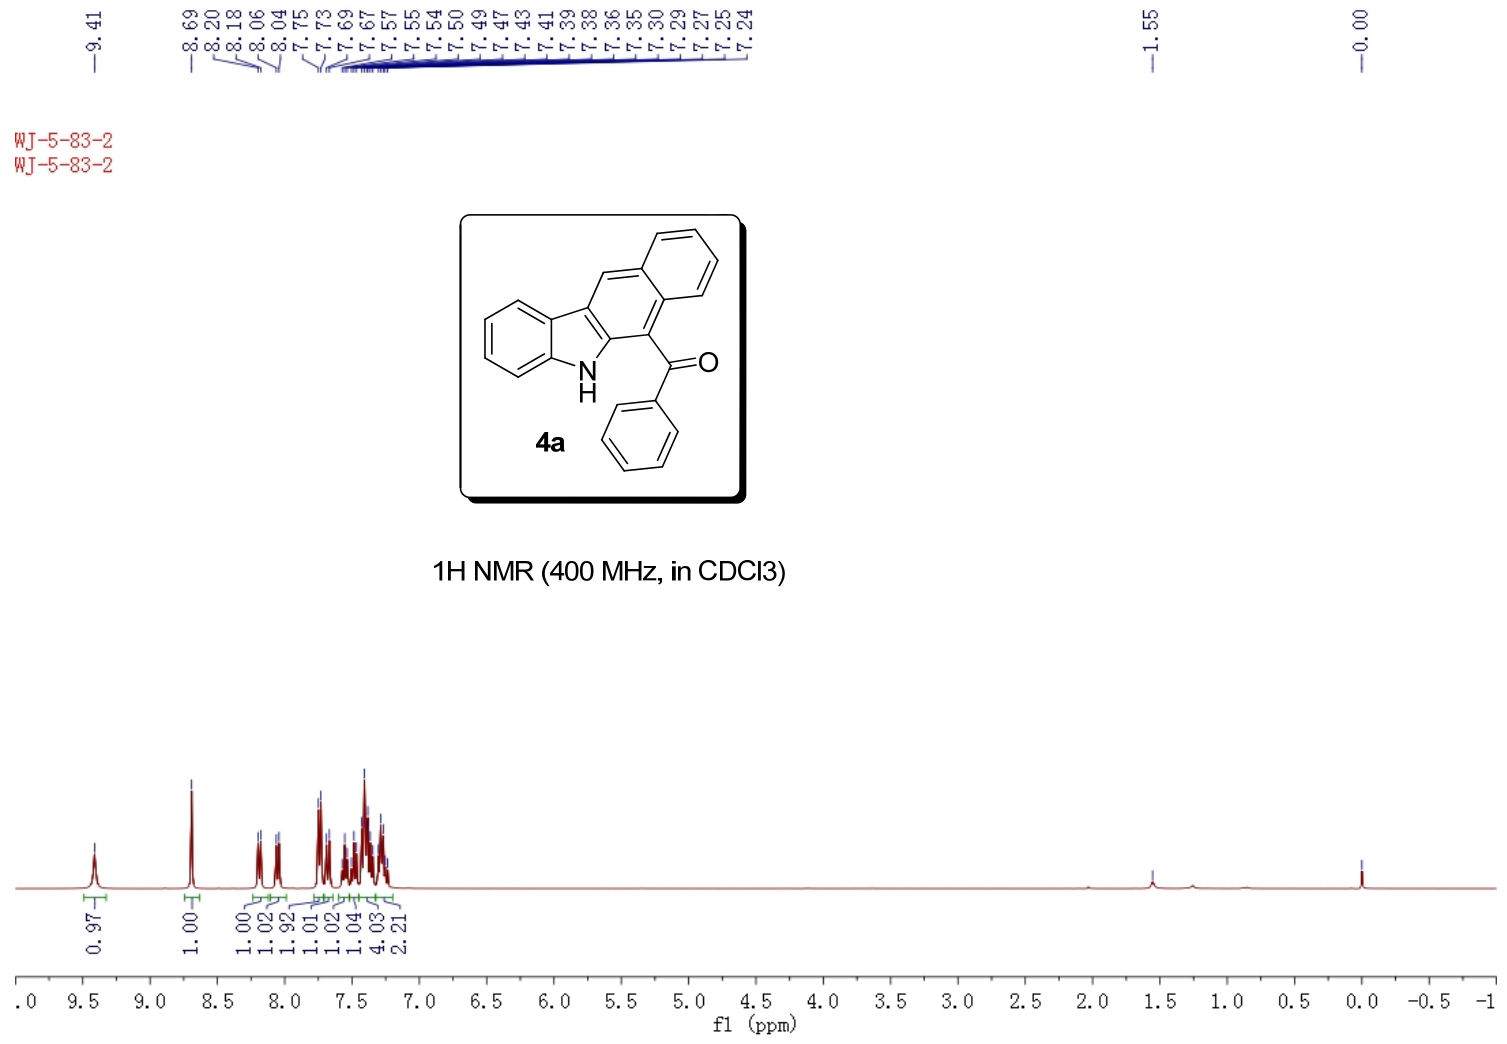

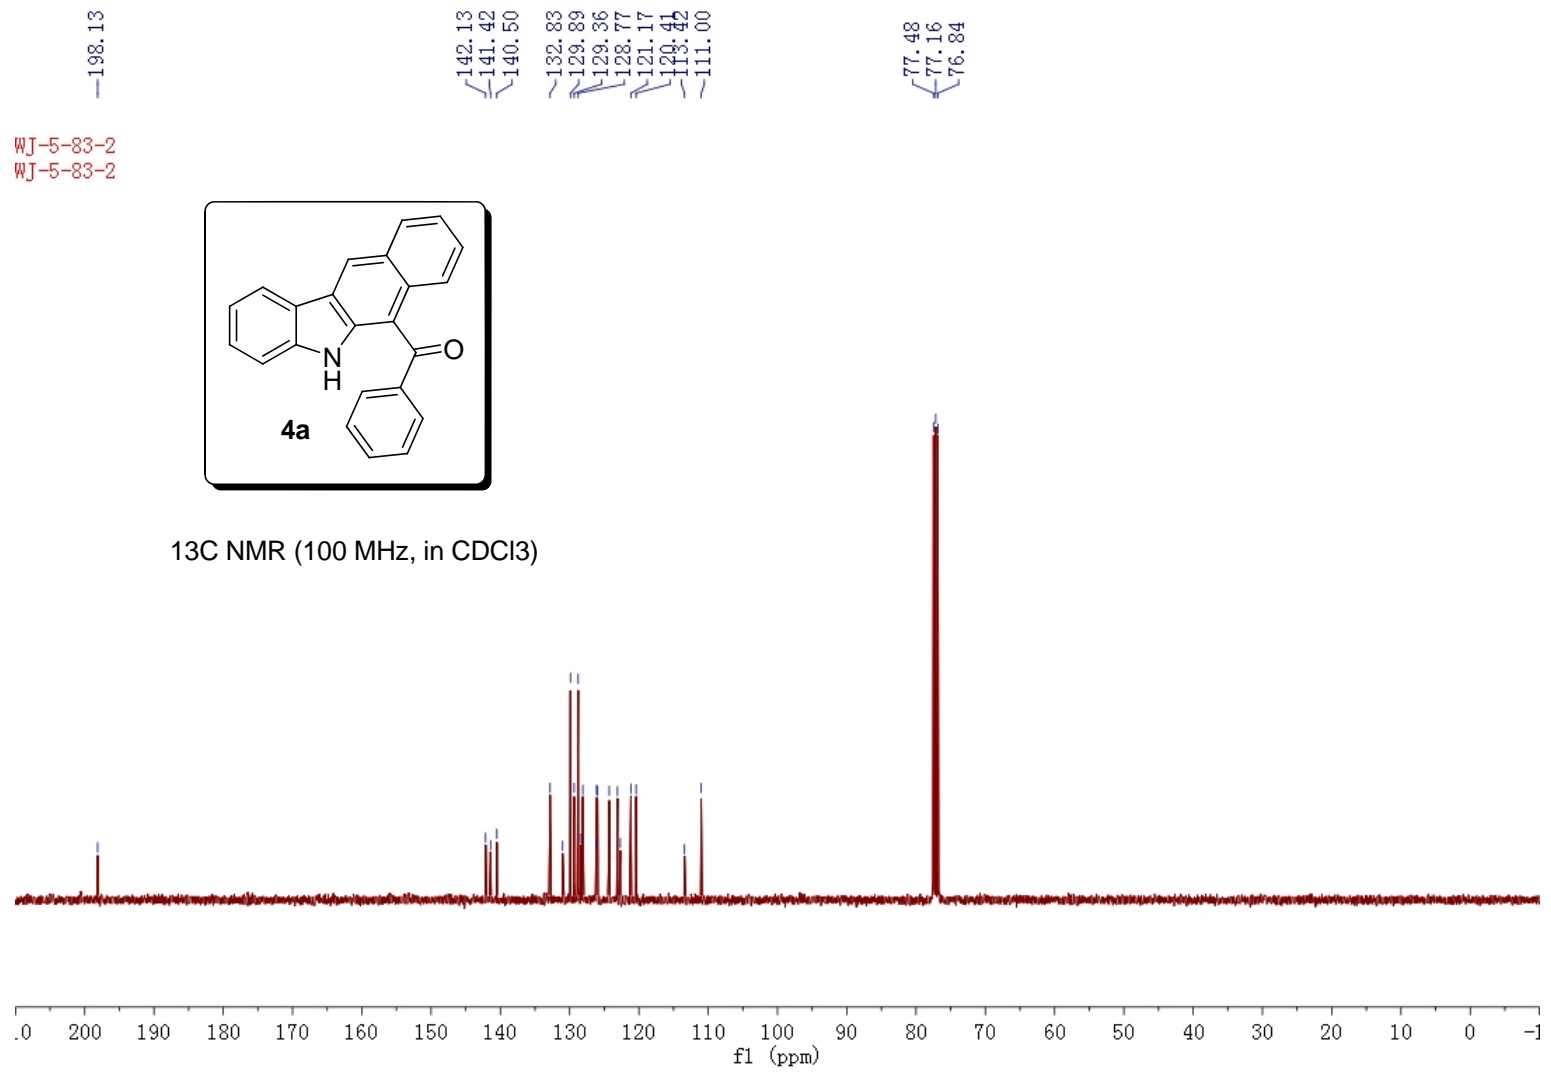

WJ-5-15B

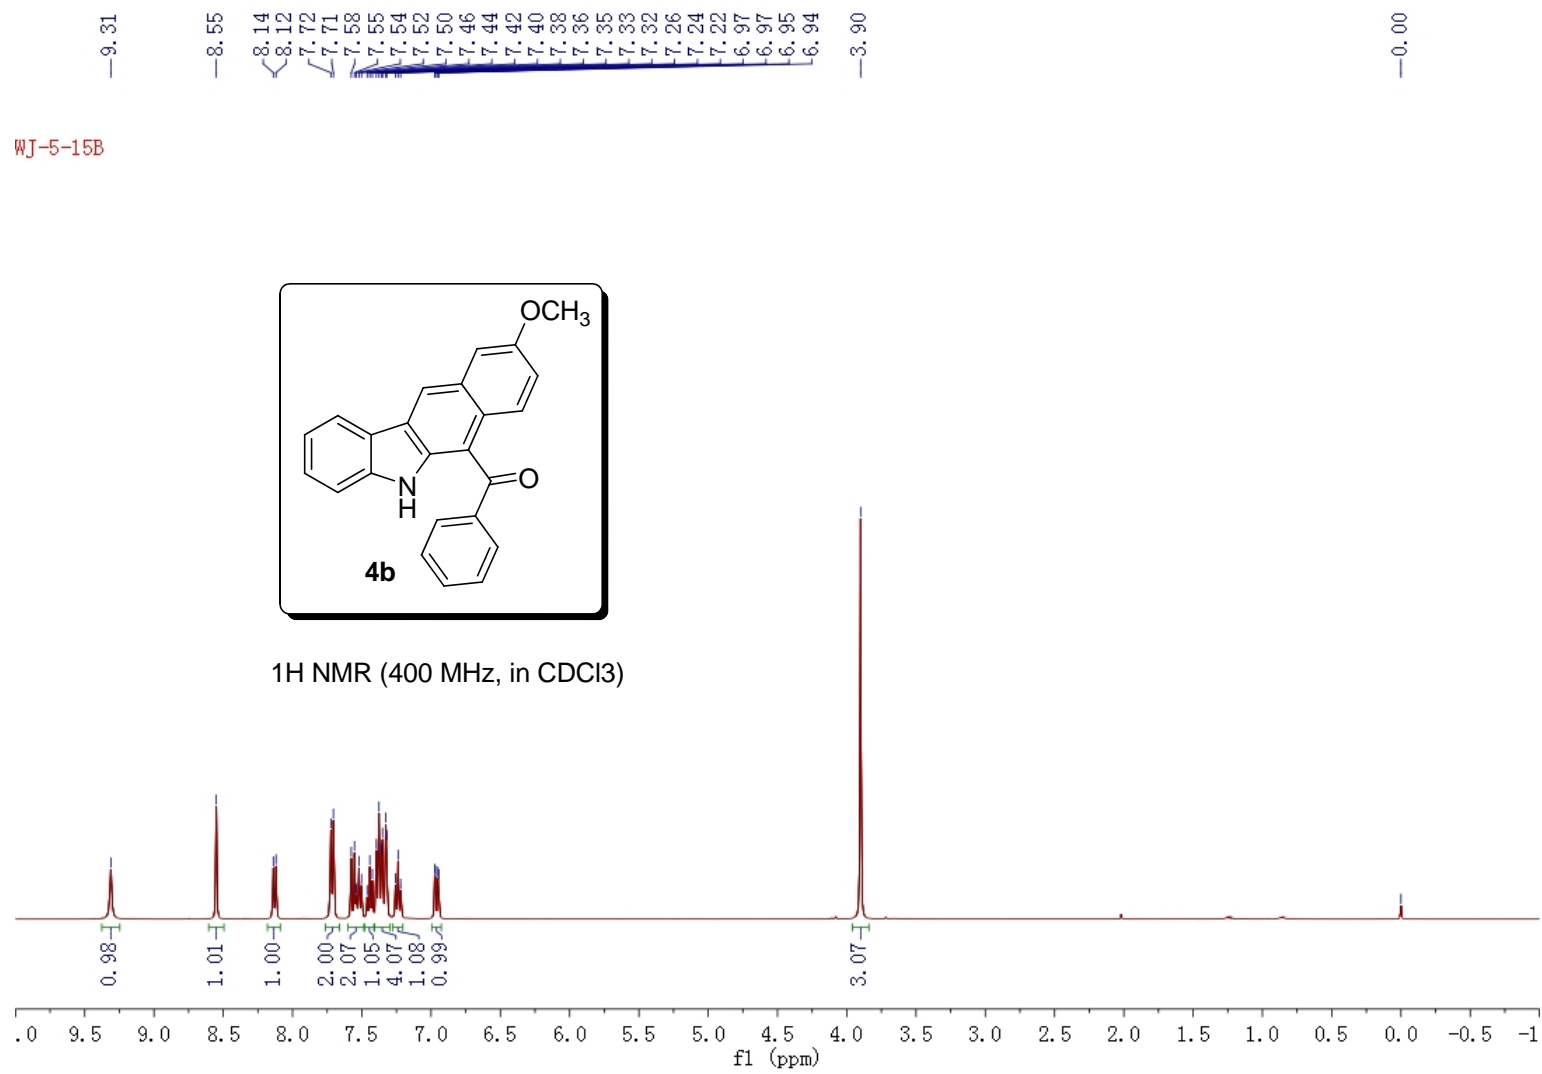

WJ-5-15B

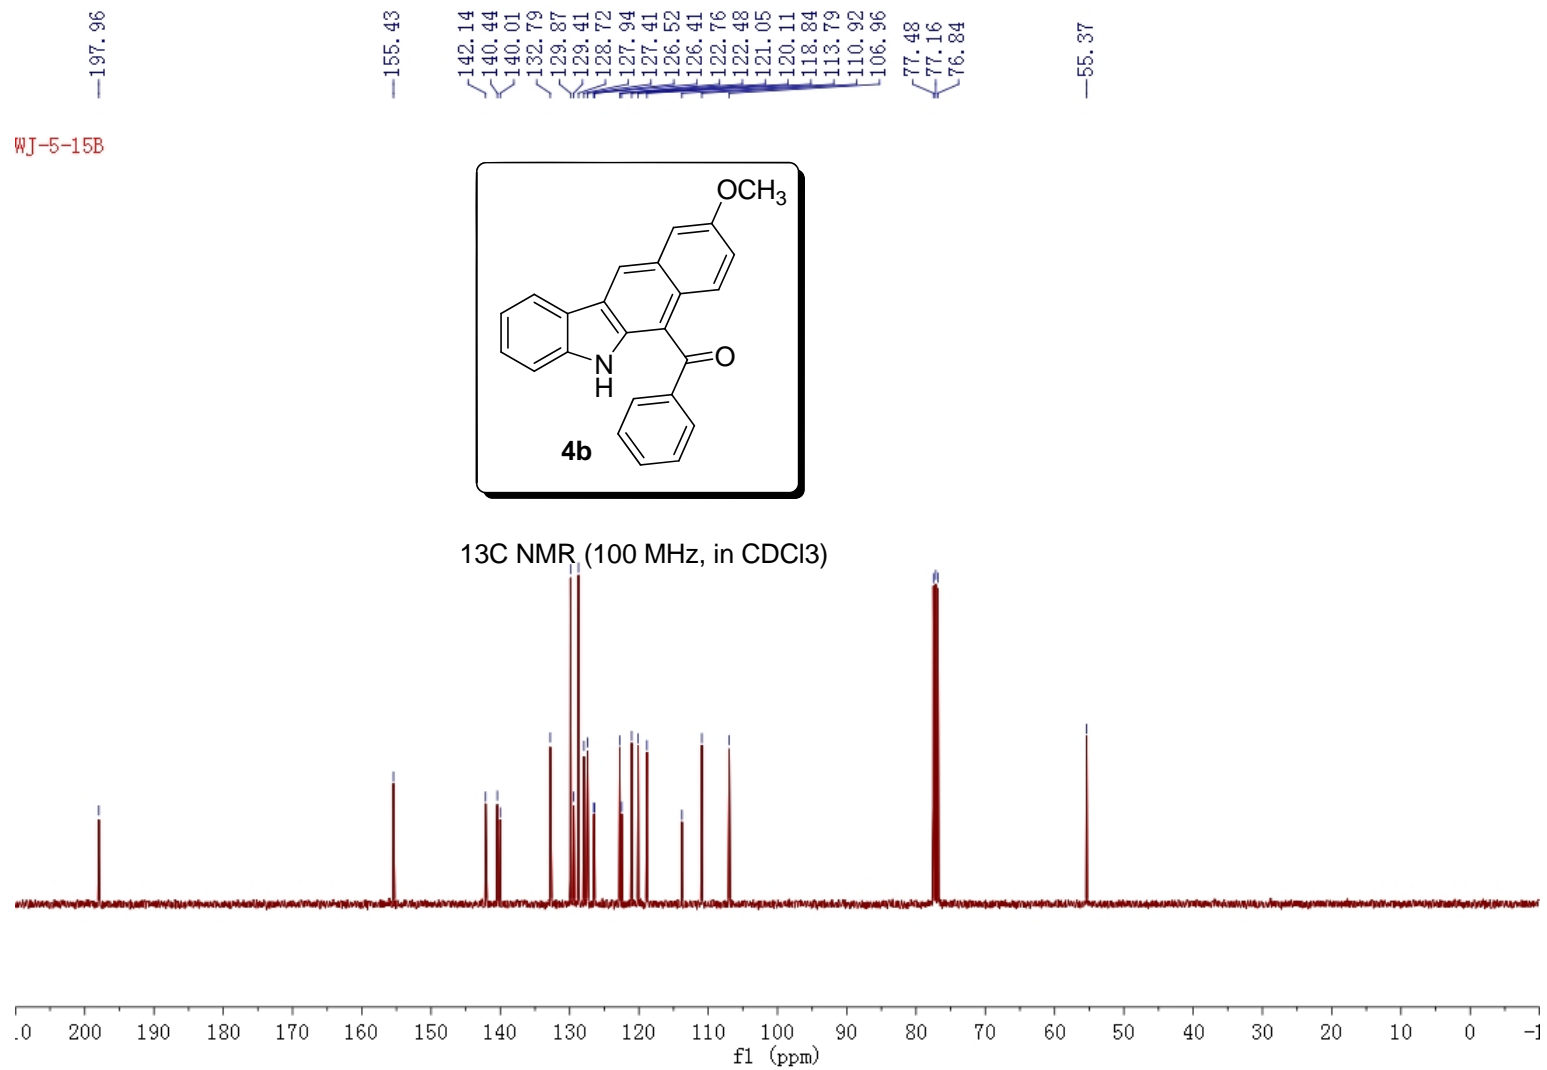

WJ-6-15C

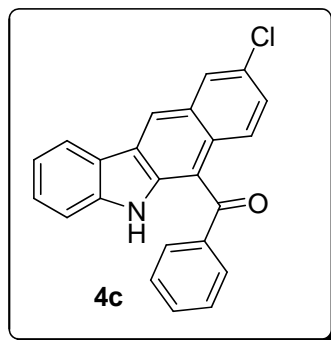

<sup>1</sup>H NMR (400 MHz, in CDCl<sub>3</sub>)

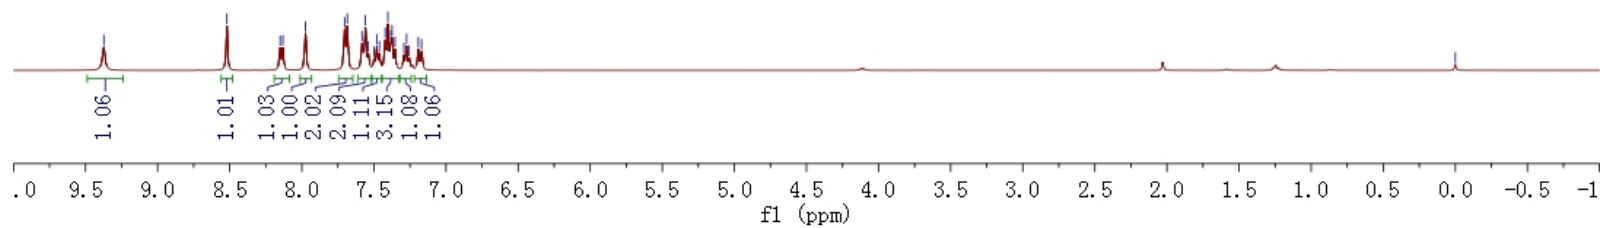

9.37

8.52  
8.15  
8.13  
7.98  
7.70  
7.68  
7.58  
7.56  
7.54  
7.50  
7.48  
7.46  
7.42  
7.40  
7.38  
7.37  
7.35  
7.29  
7.27  
7.25  
7.19  
7.17

0.00

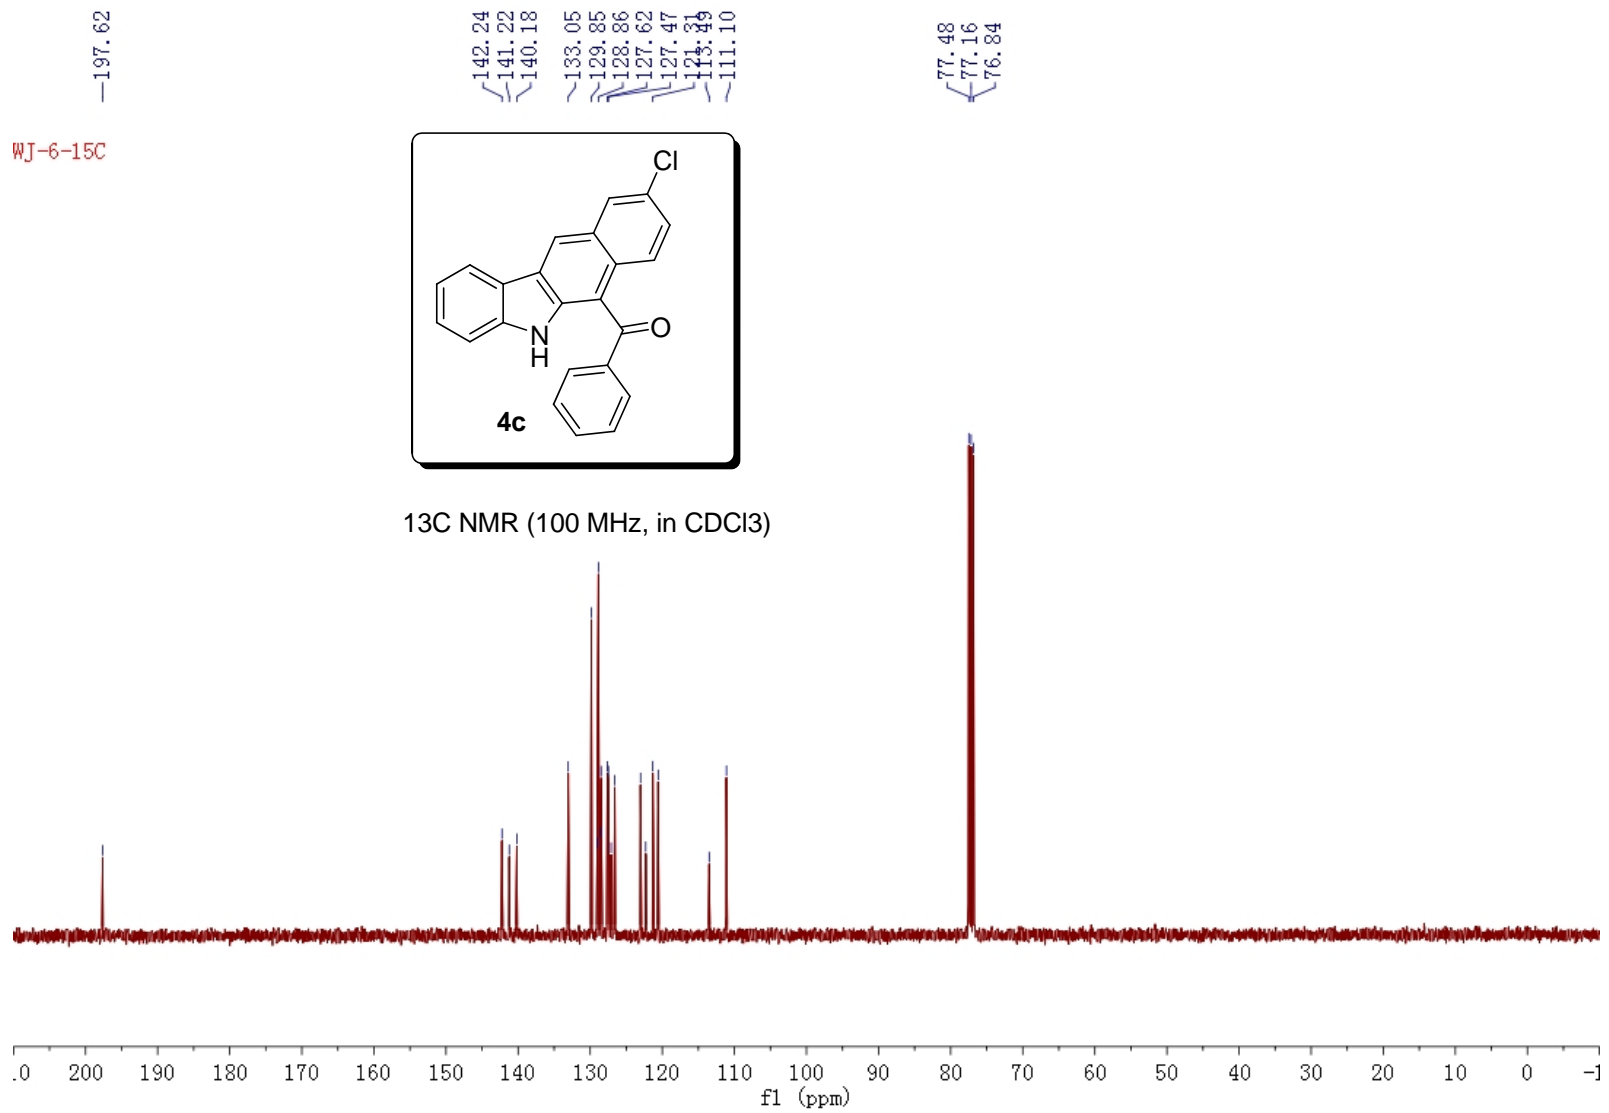

WJ-5-16D-3

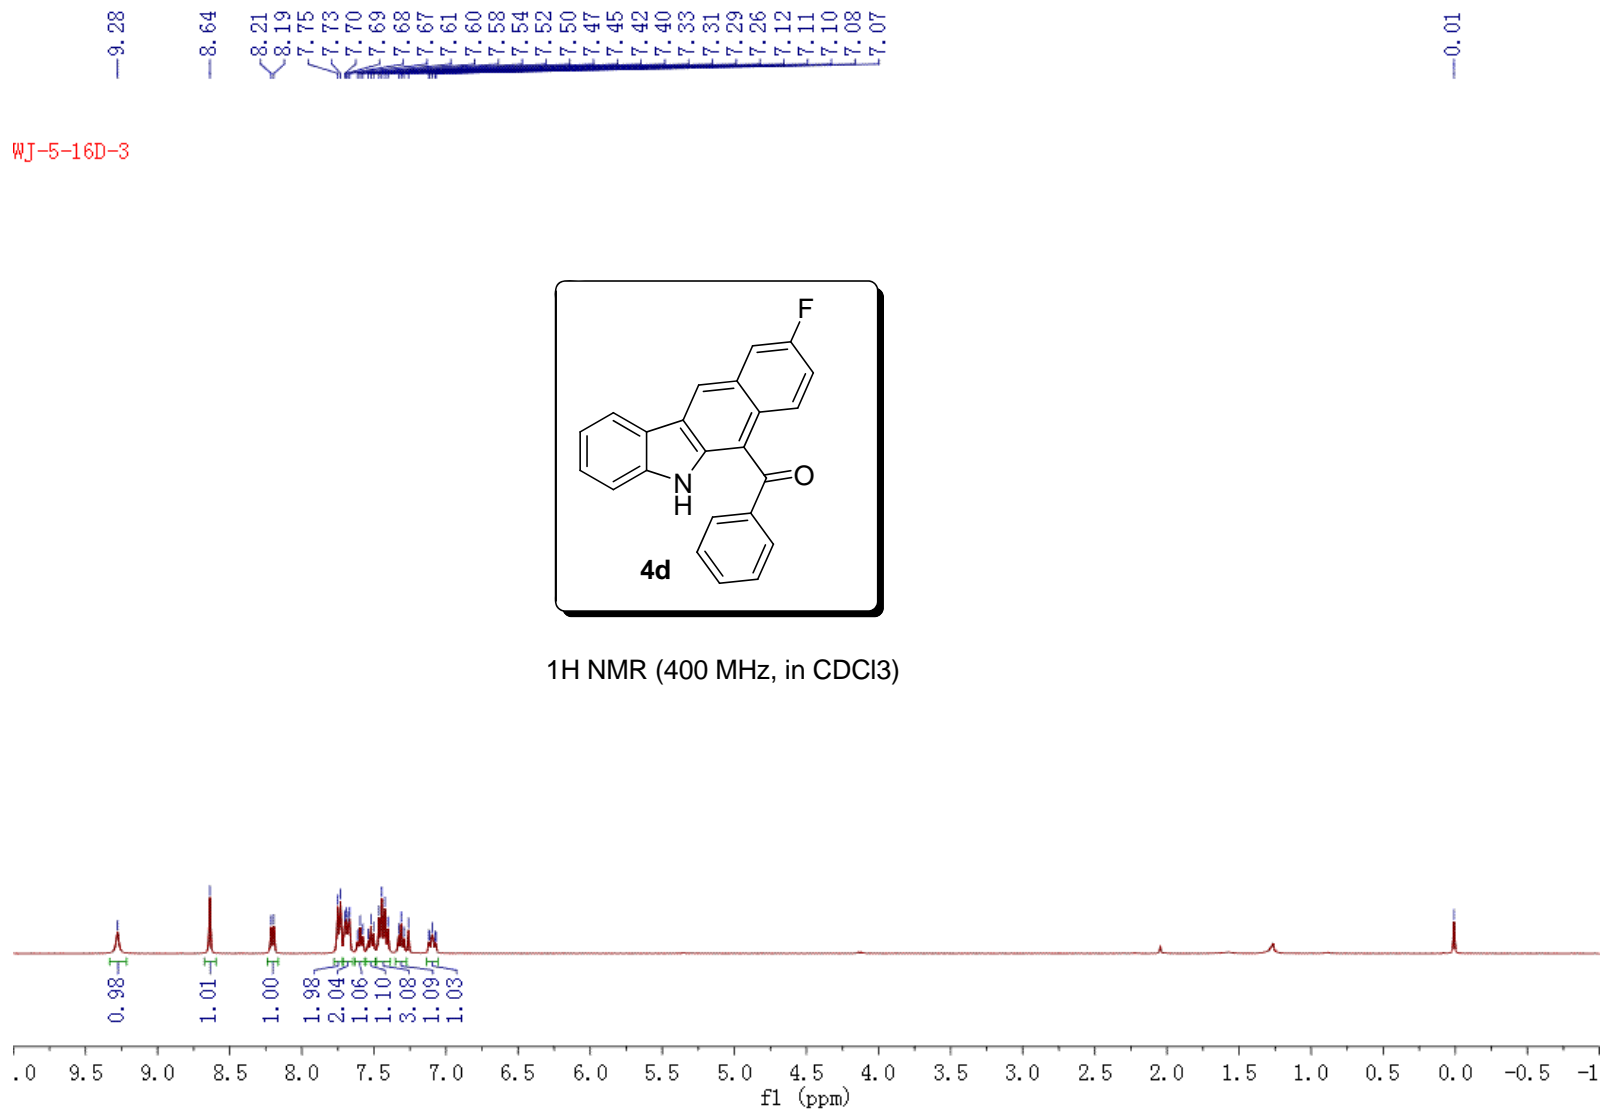



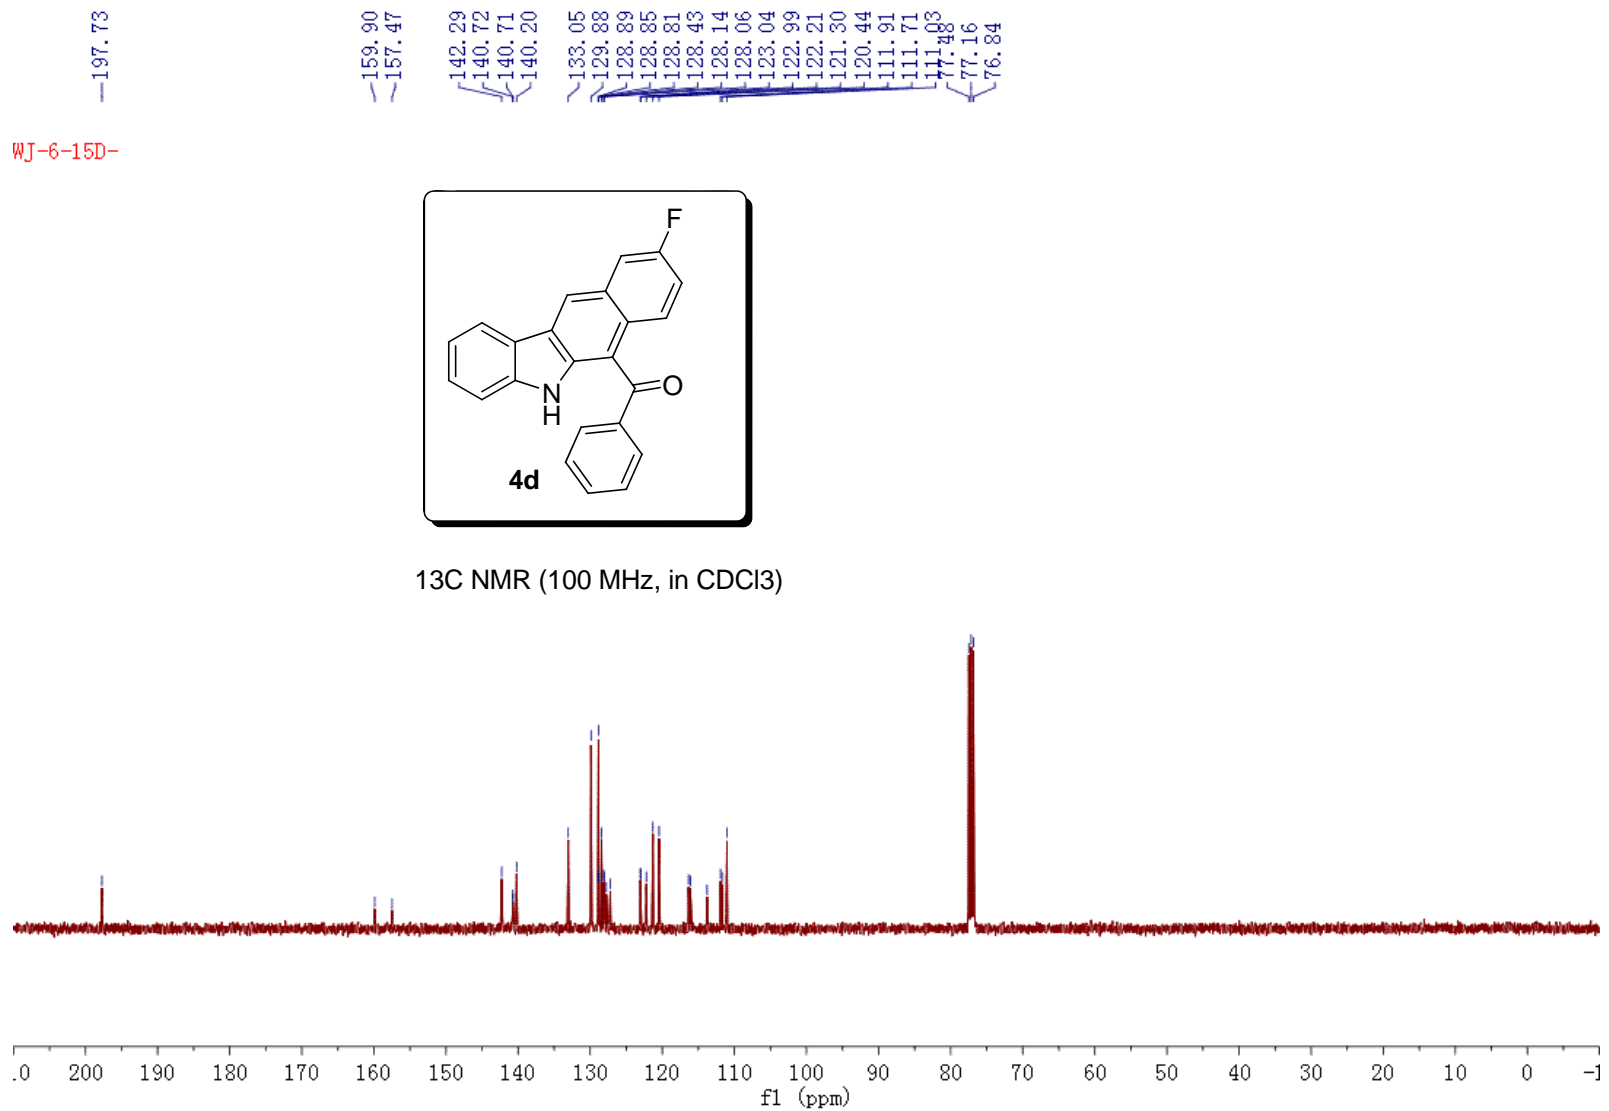

WJ-6-15A

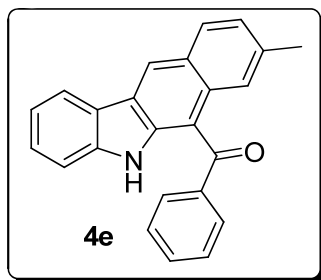

<sup>1</sup>H NMR (400 MHz, in CDCl<sub>3</sub>)

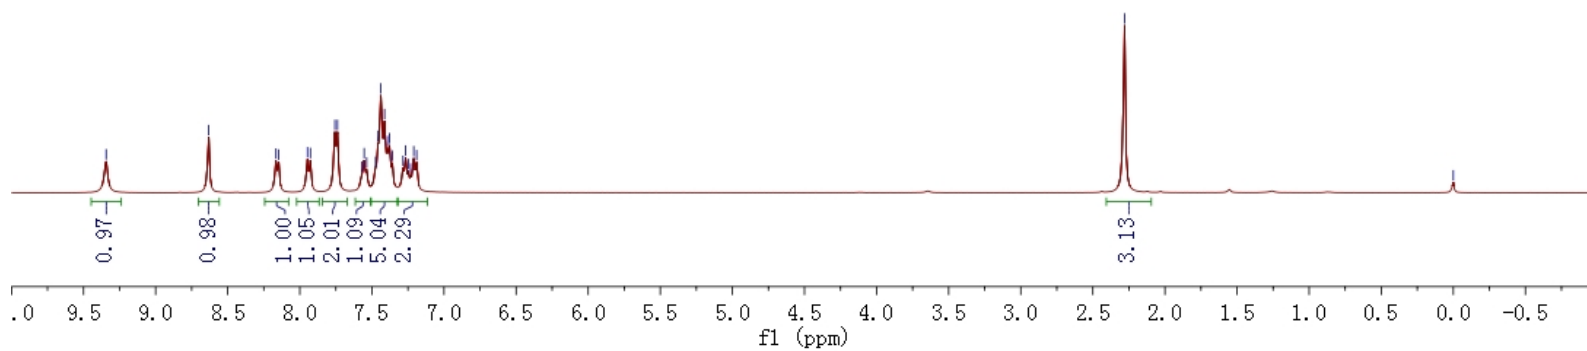

9.34  
8.63  
8.17  
8.15  
7.95  
7.93  
7.76  
7.74  
7.57  
7.55  
7.54  
7.47  
7.46  
7.44  
7.41  
7.39  
7.38  
7.36  
7.28  
7.27  
7.25  
7.23  
7.21  
7.19

2.28

0.00

WJ-6-15A

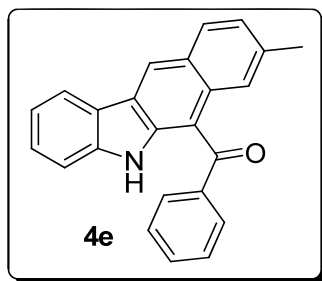

<sup>13</sup>C NMR (100 MHz, in CDCl<sub>3</sub>)

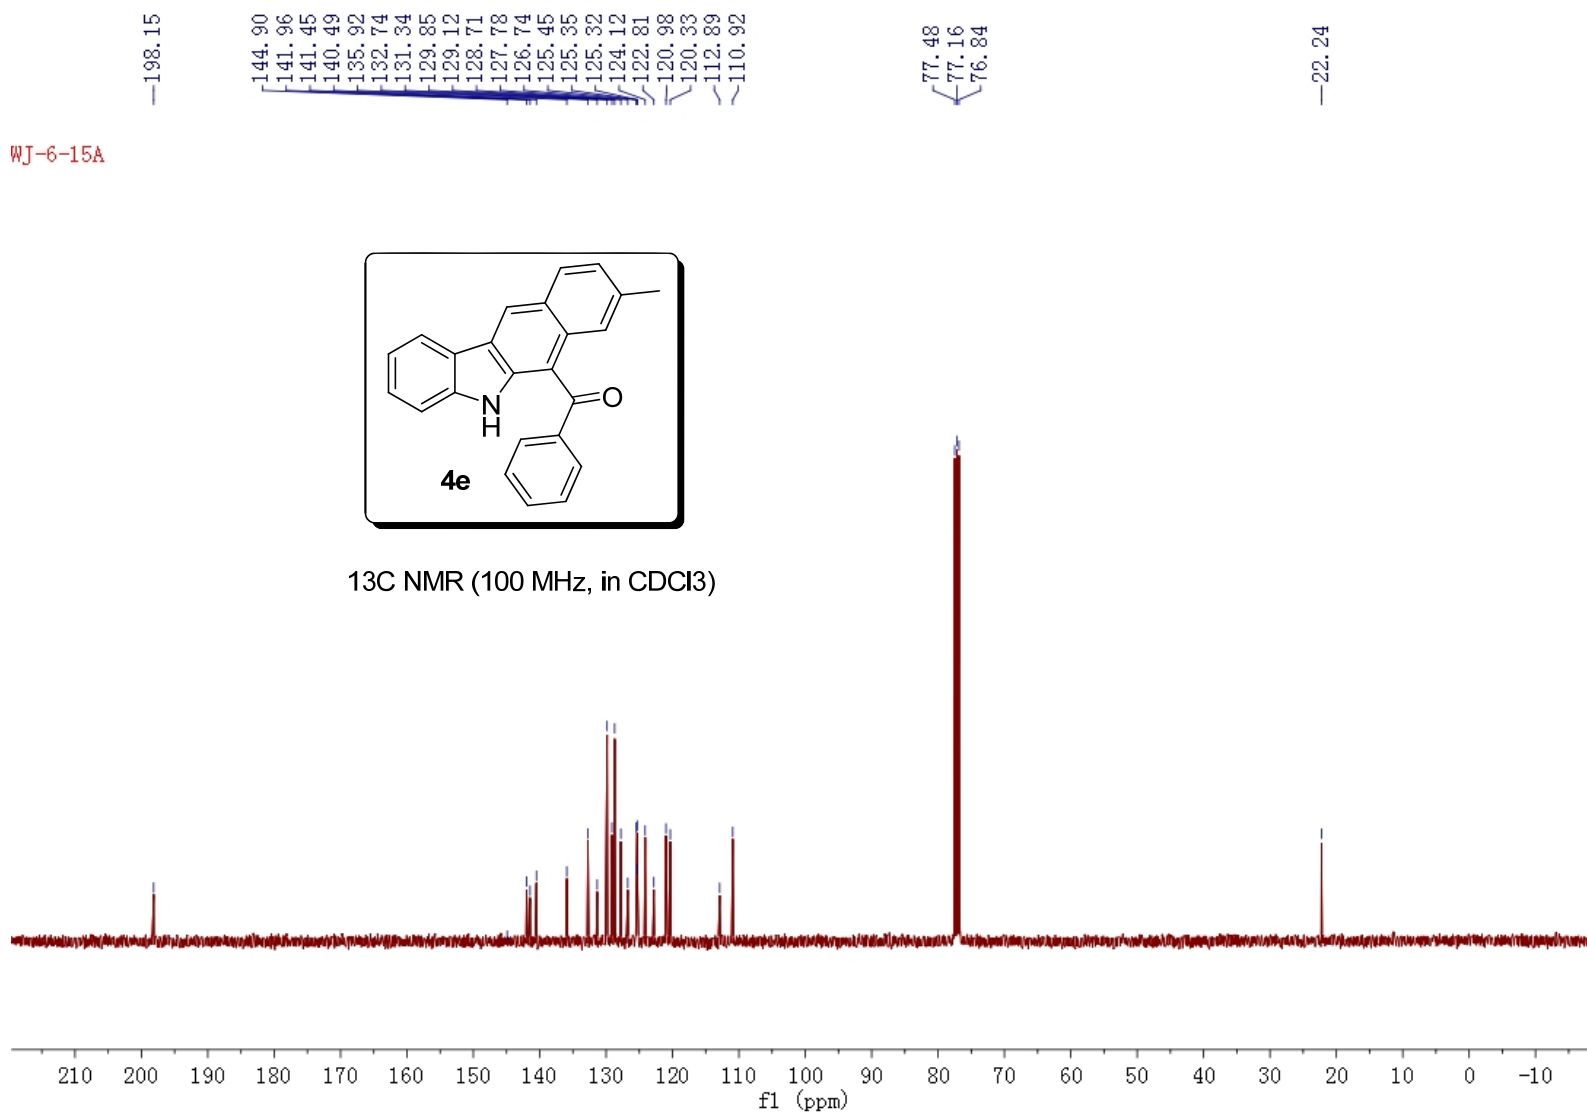

WJ-6-15E

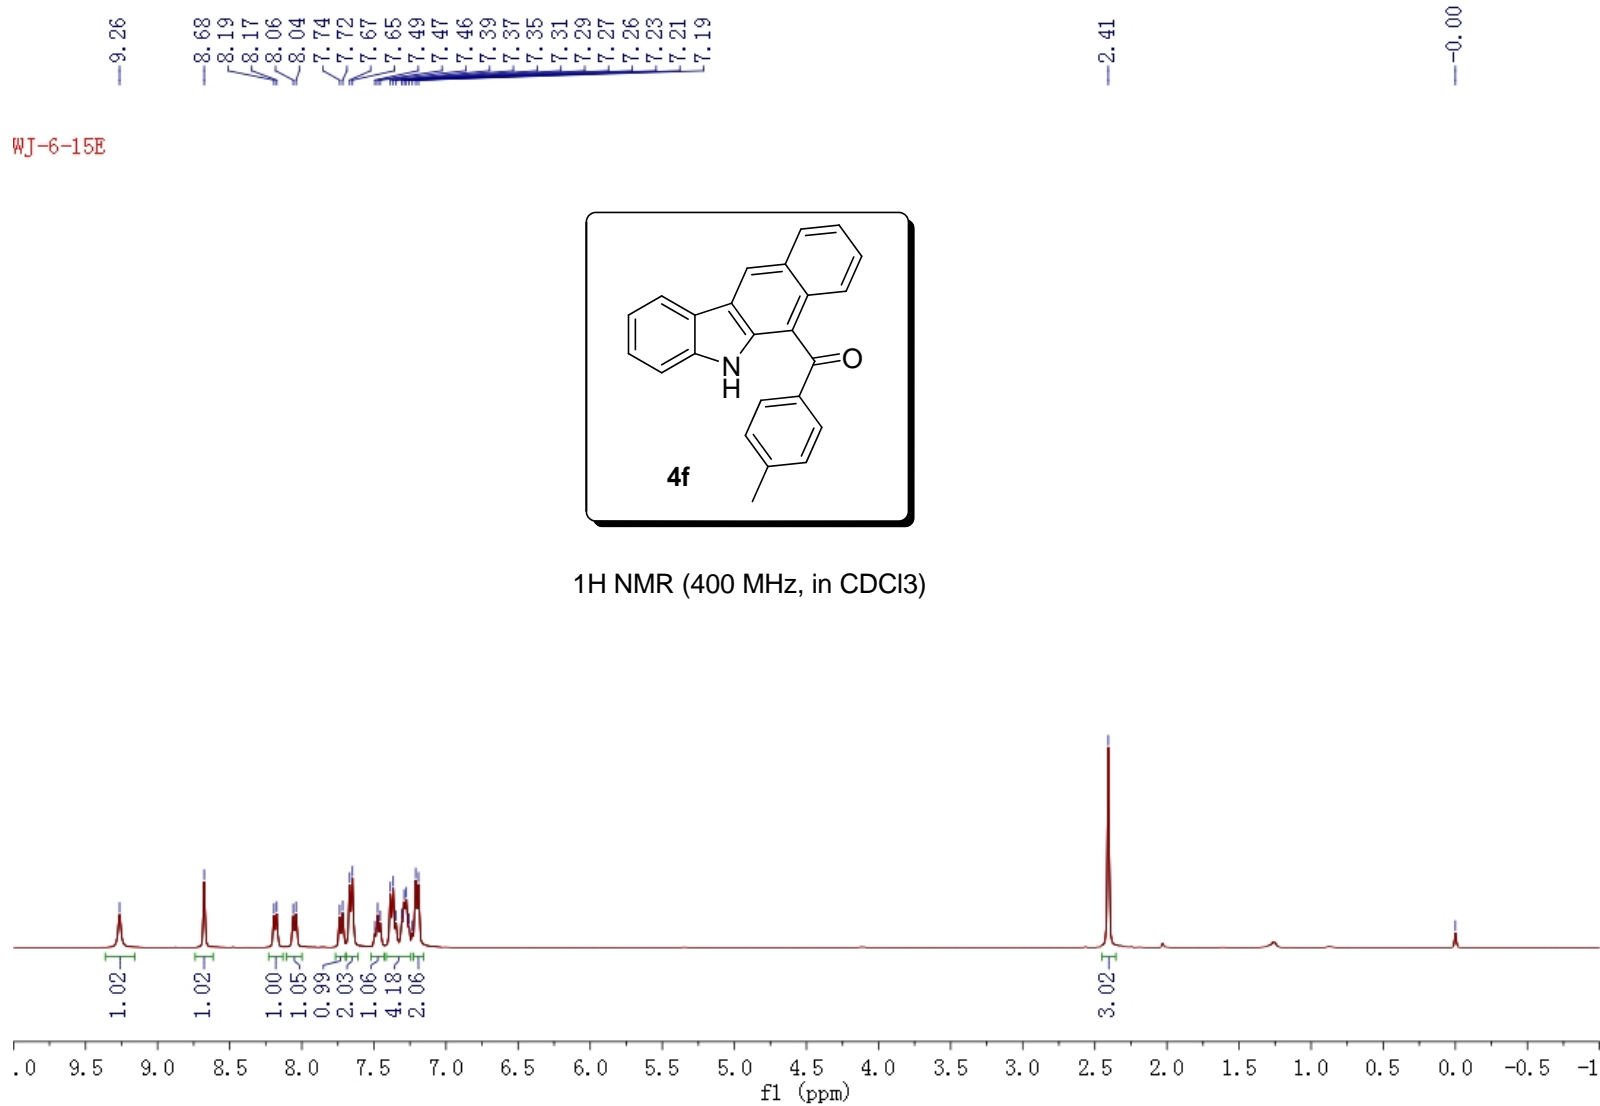

WJ-6-15E

—197.74

143.82  
142.14  
141.03  
137.64  
130.97  
130.16  
129.47  
129.28  
128.33  
128.04  
126.14  
126.09  
125.88  
123.80  
123.05  
122.72  
121.15  
120.30  
113.87  
110.95

77.48  
77.16  
76.84

—21.86

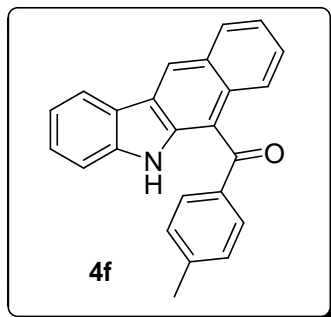

<sup>13</sup>C NMR (100 MHz, in CDCl<sub>3</sub>)

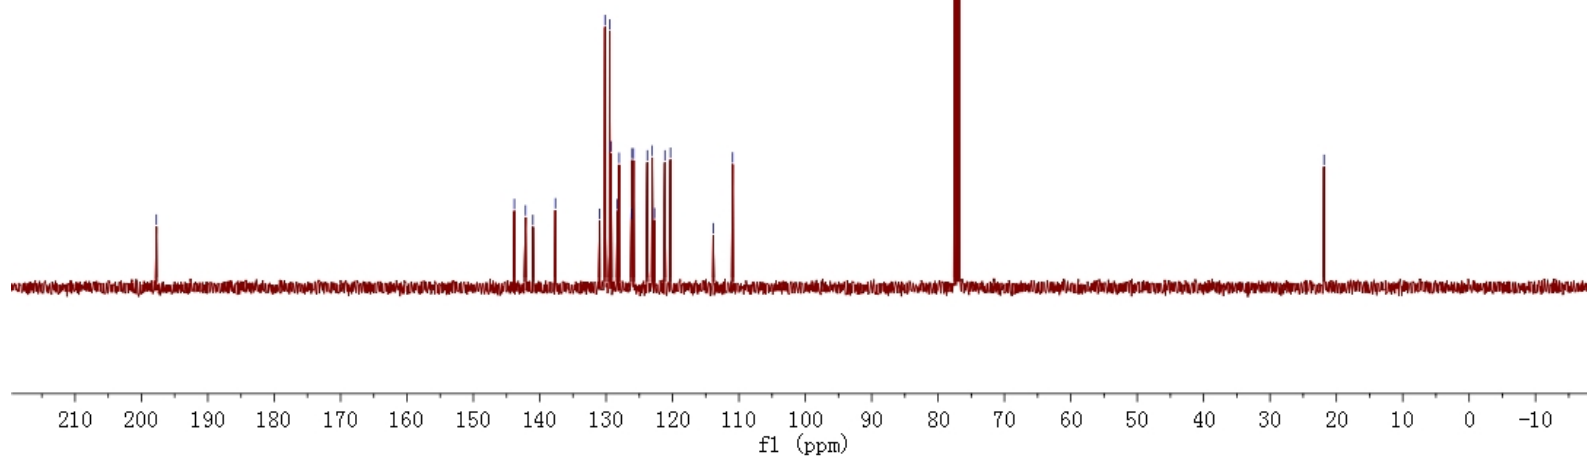

WJ-6-15F

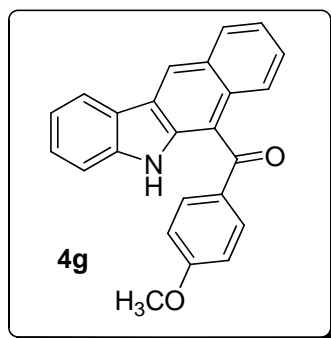

<sup>1</sup>H NMR (400 MHz, in CDCl<sub>3</sub>)

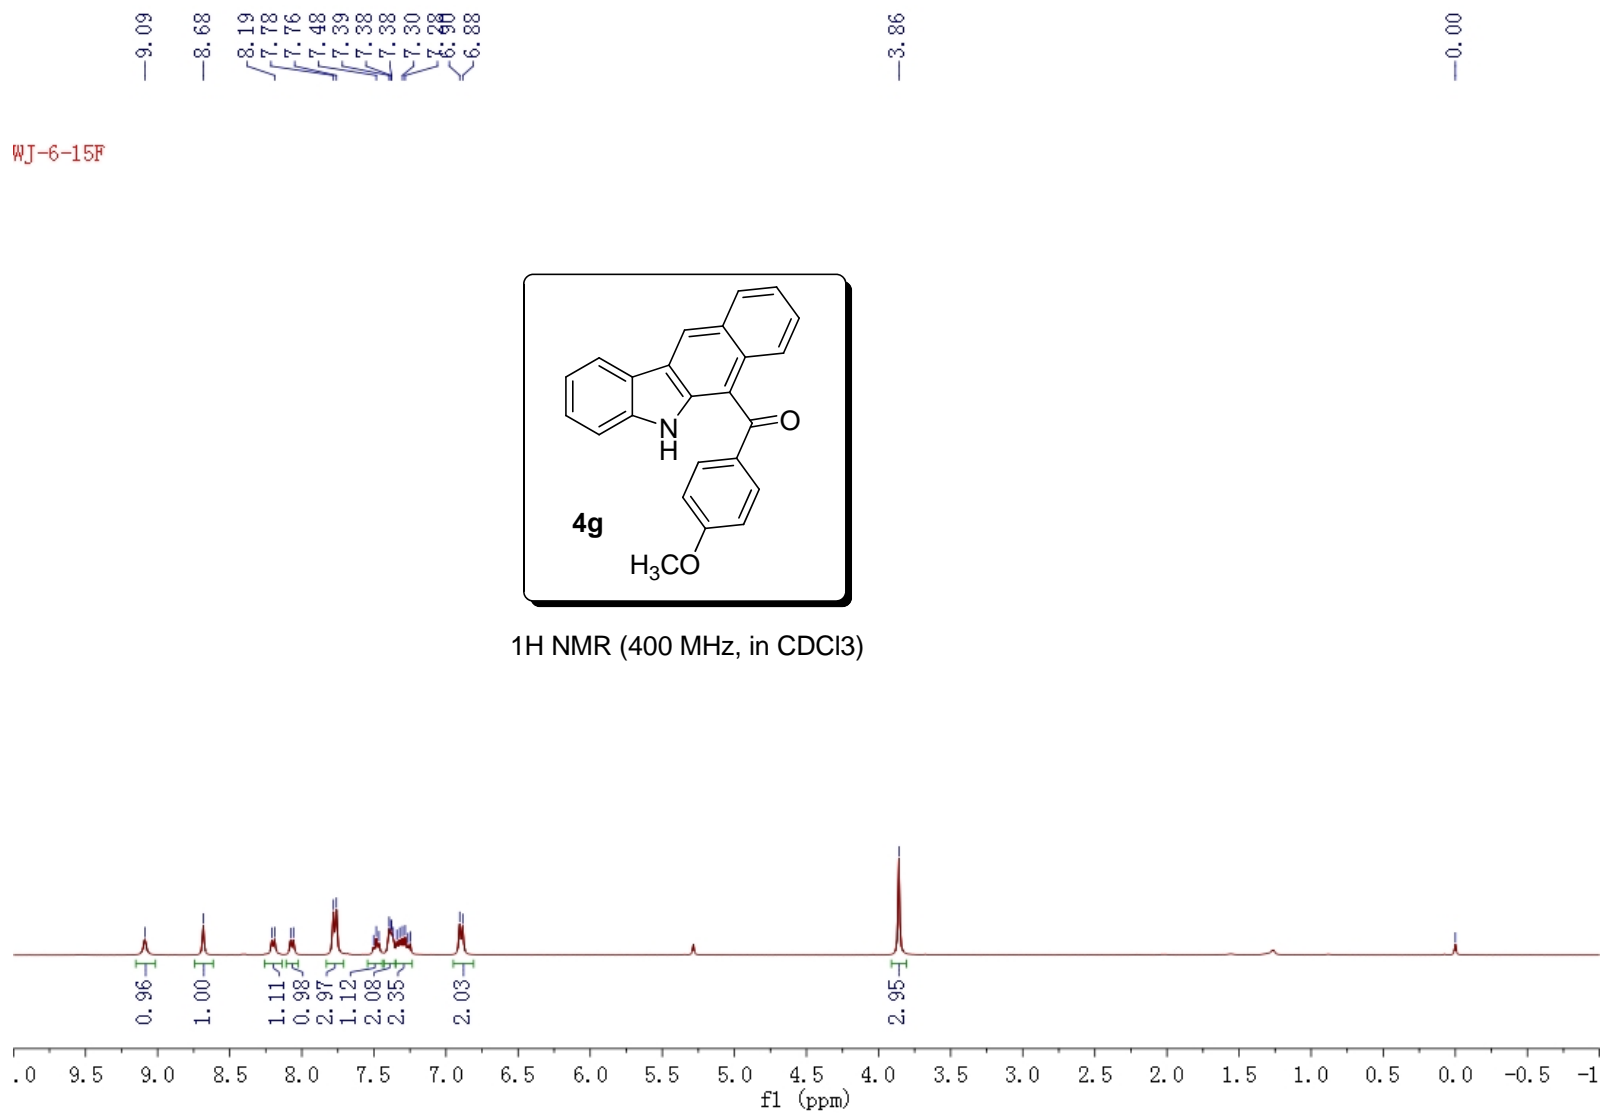

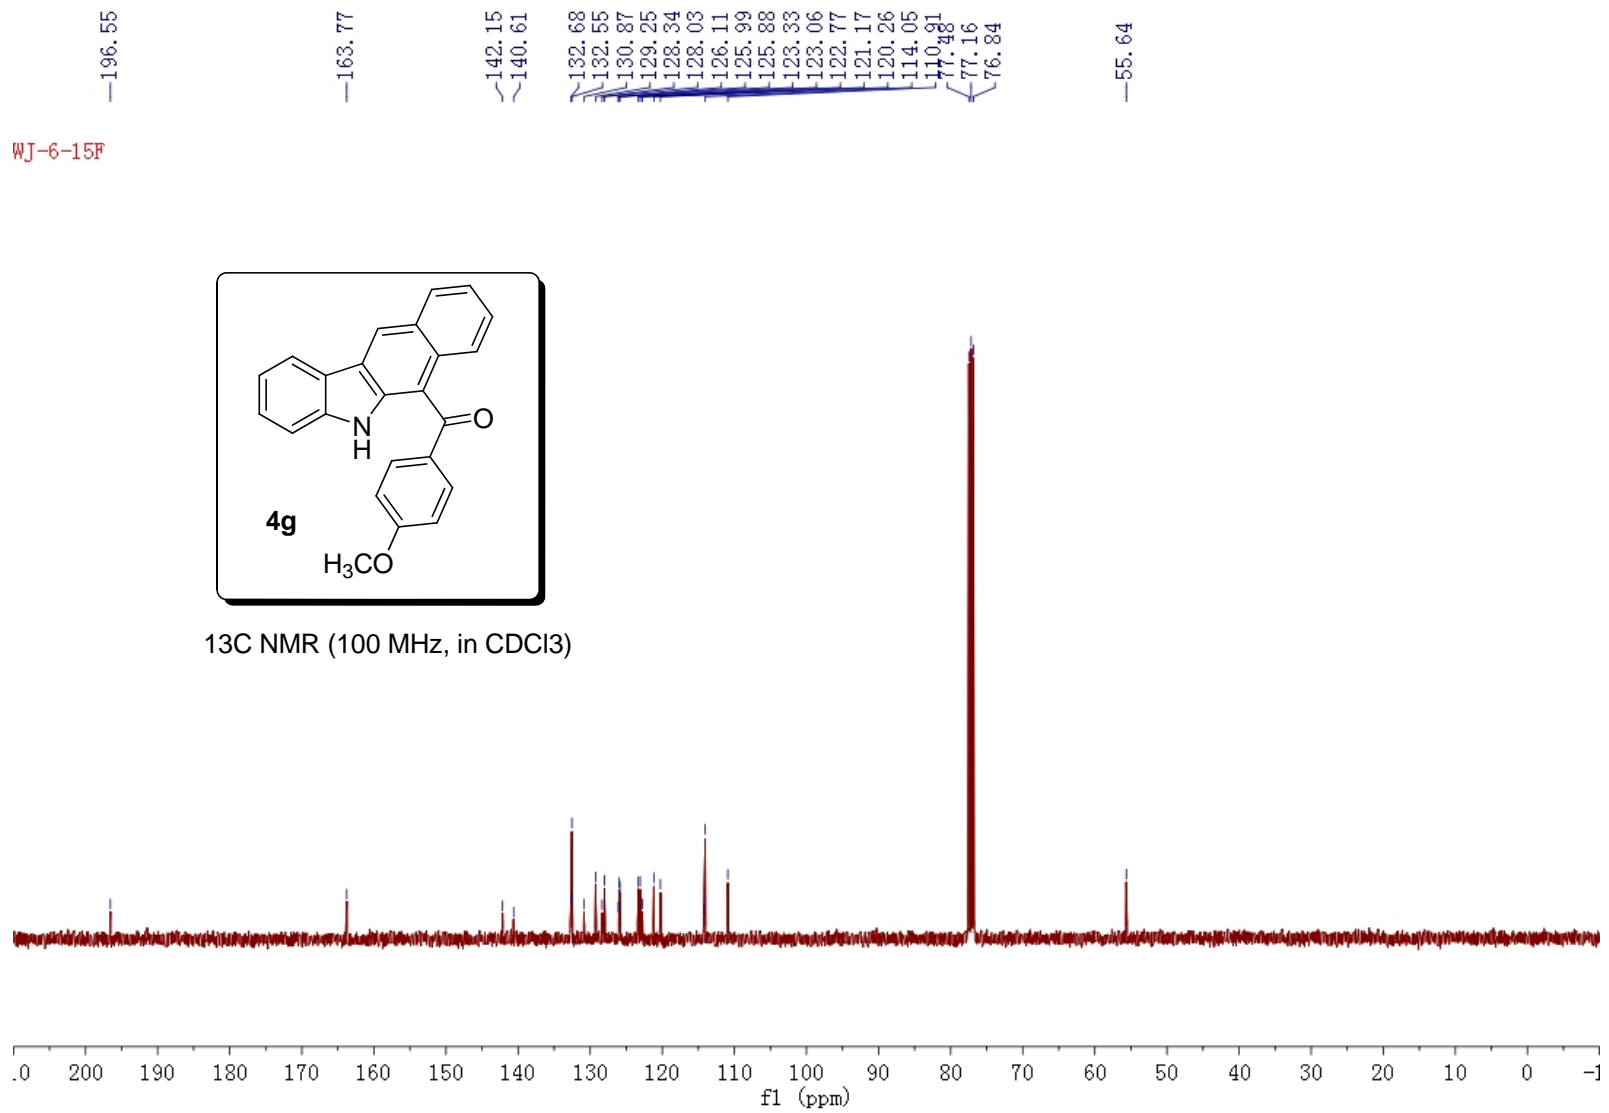

WJ-6-15G-

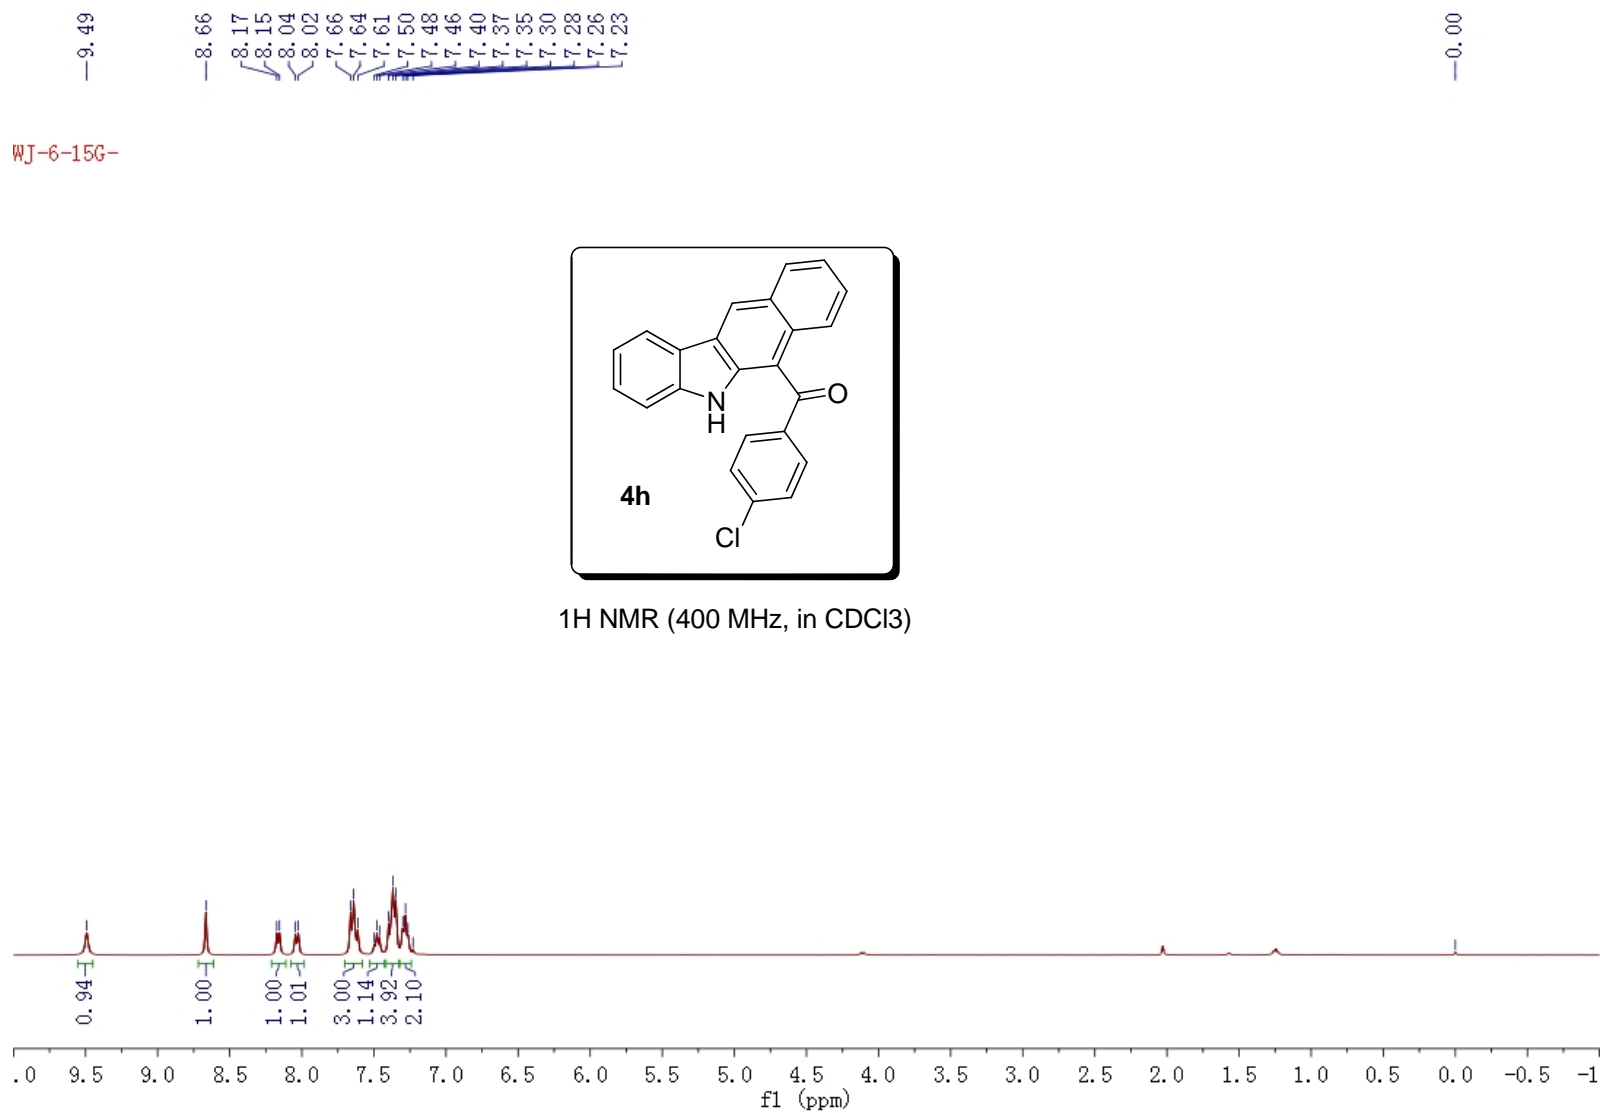



WJ-6-15G-

196.71

142.10  
141.57  
139.17  
138.80  
131.31  
129.47  
129.07  
125.97  
123.17  
121.83  
111.05

77.48  
77.16  
76.84

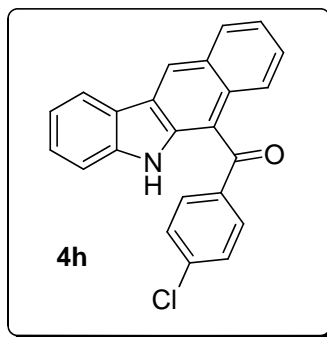

<sup>13</sup>C NMR (100 MHz, in CDCl<sub>3</sub>)

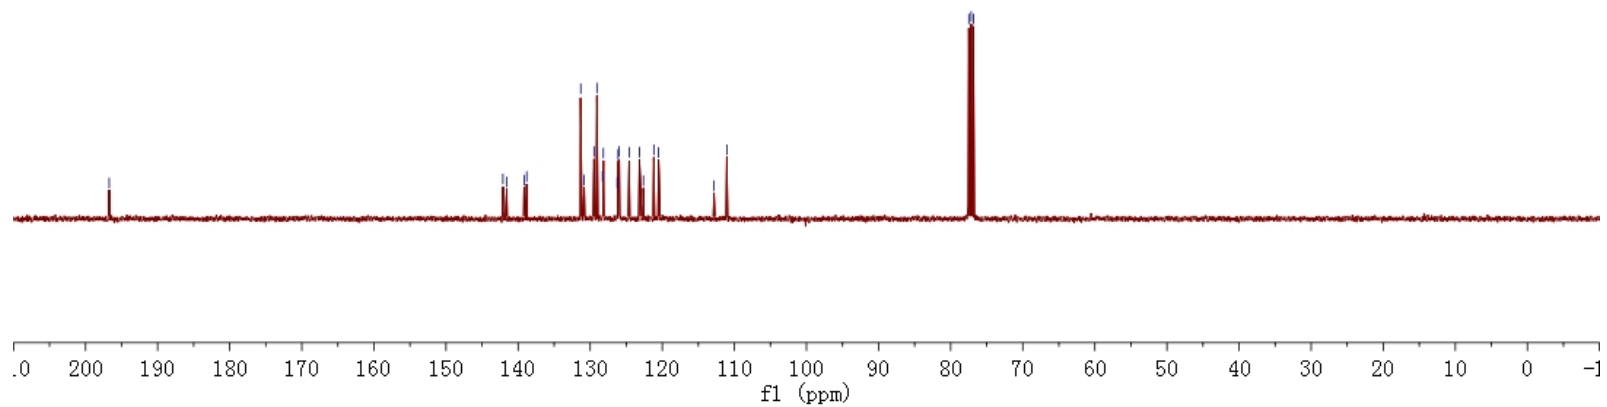

WJ-6-19E

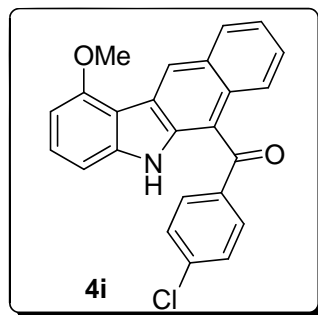

<sup>1</sup>H NMR (400 MHz, in CDCl<sub>3</sub>)

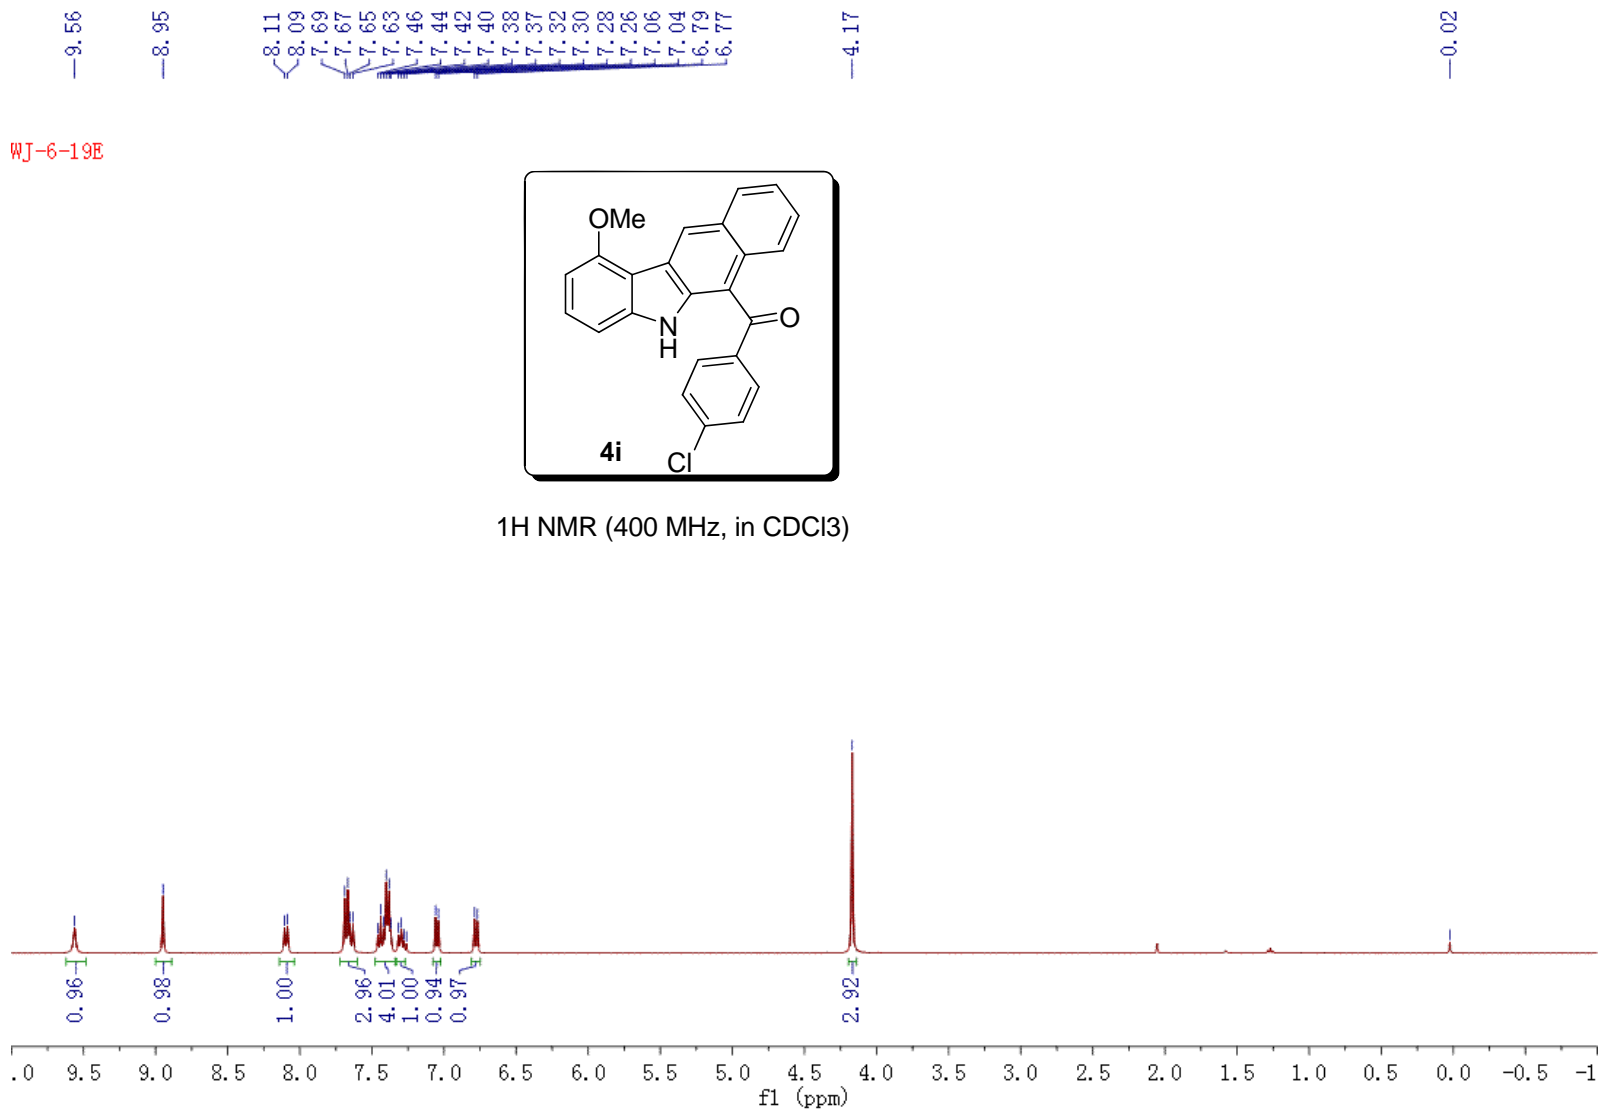

WJ-6-19E

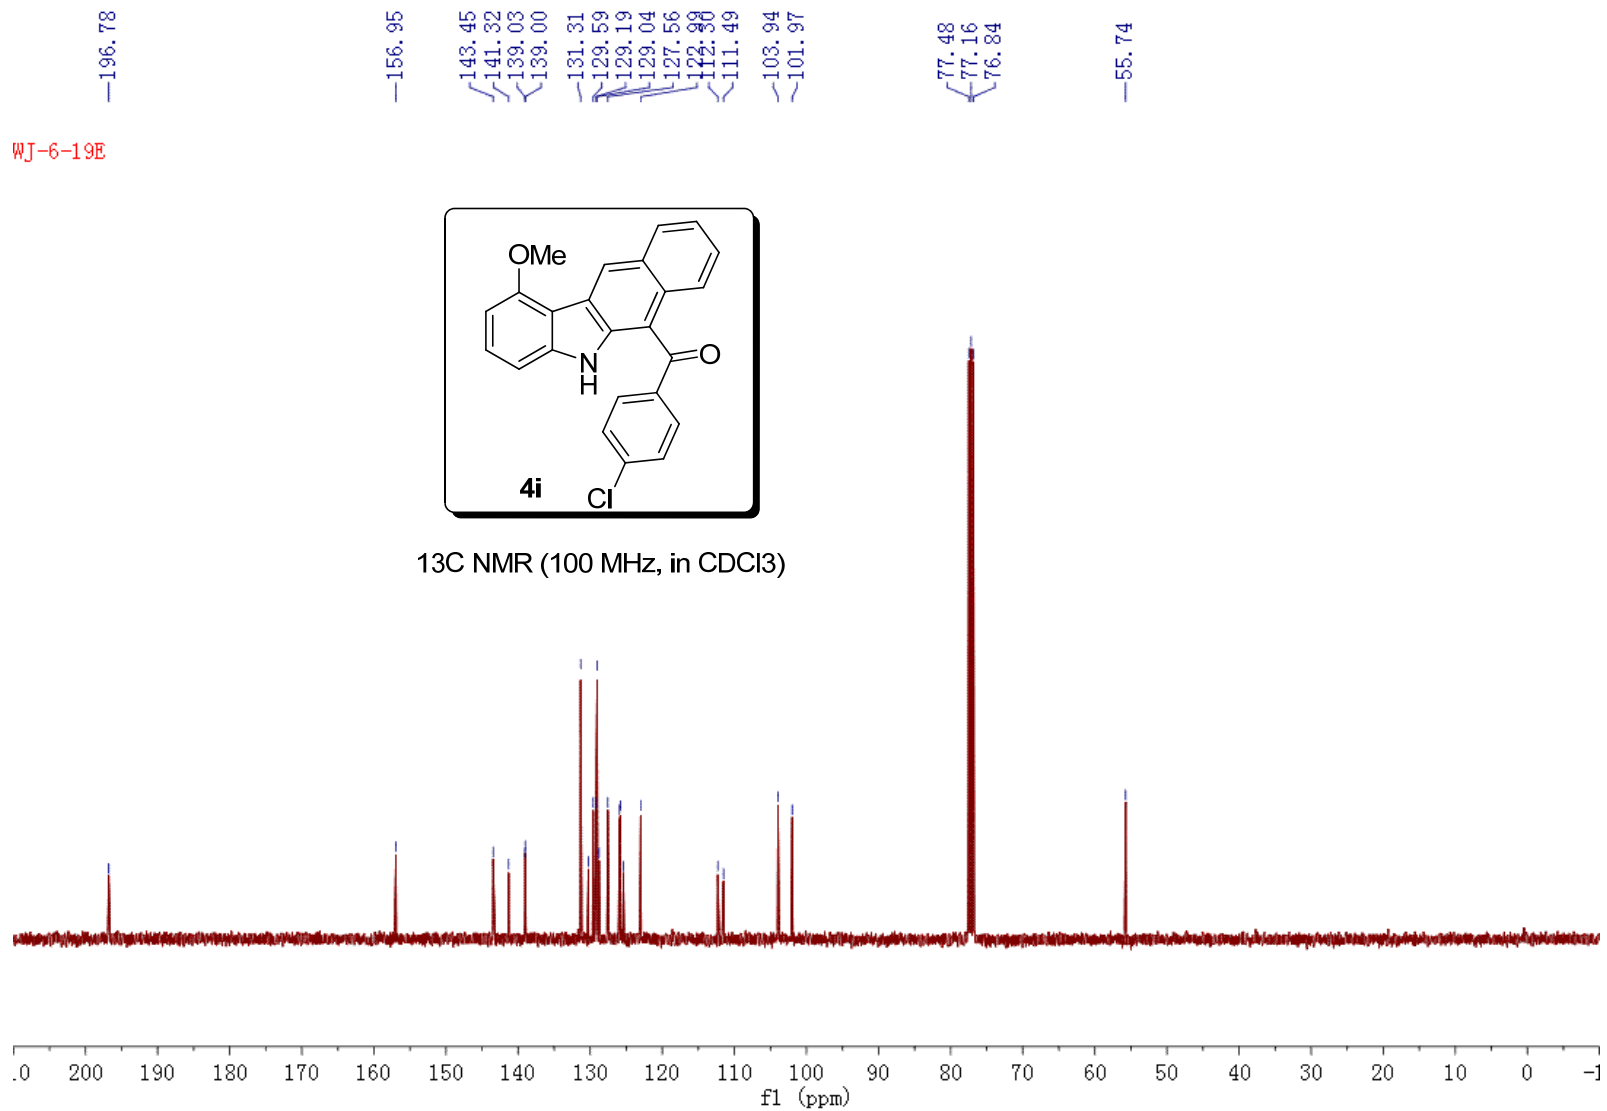

WJ-5-19A

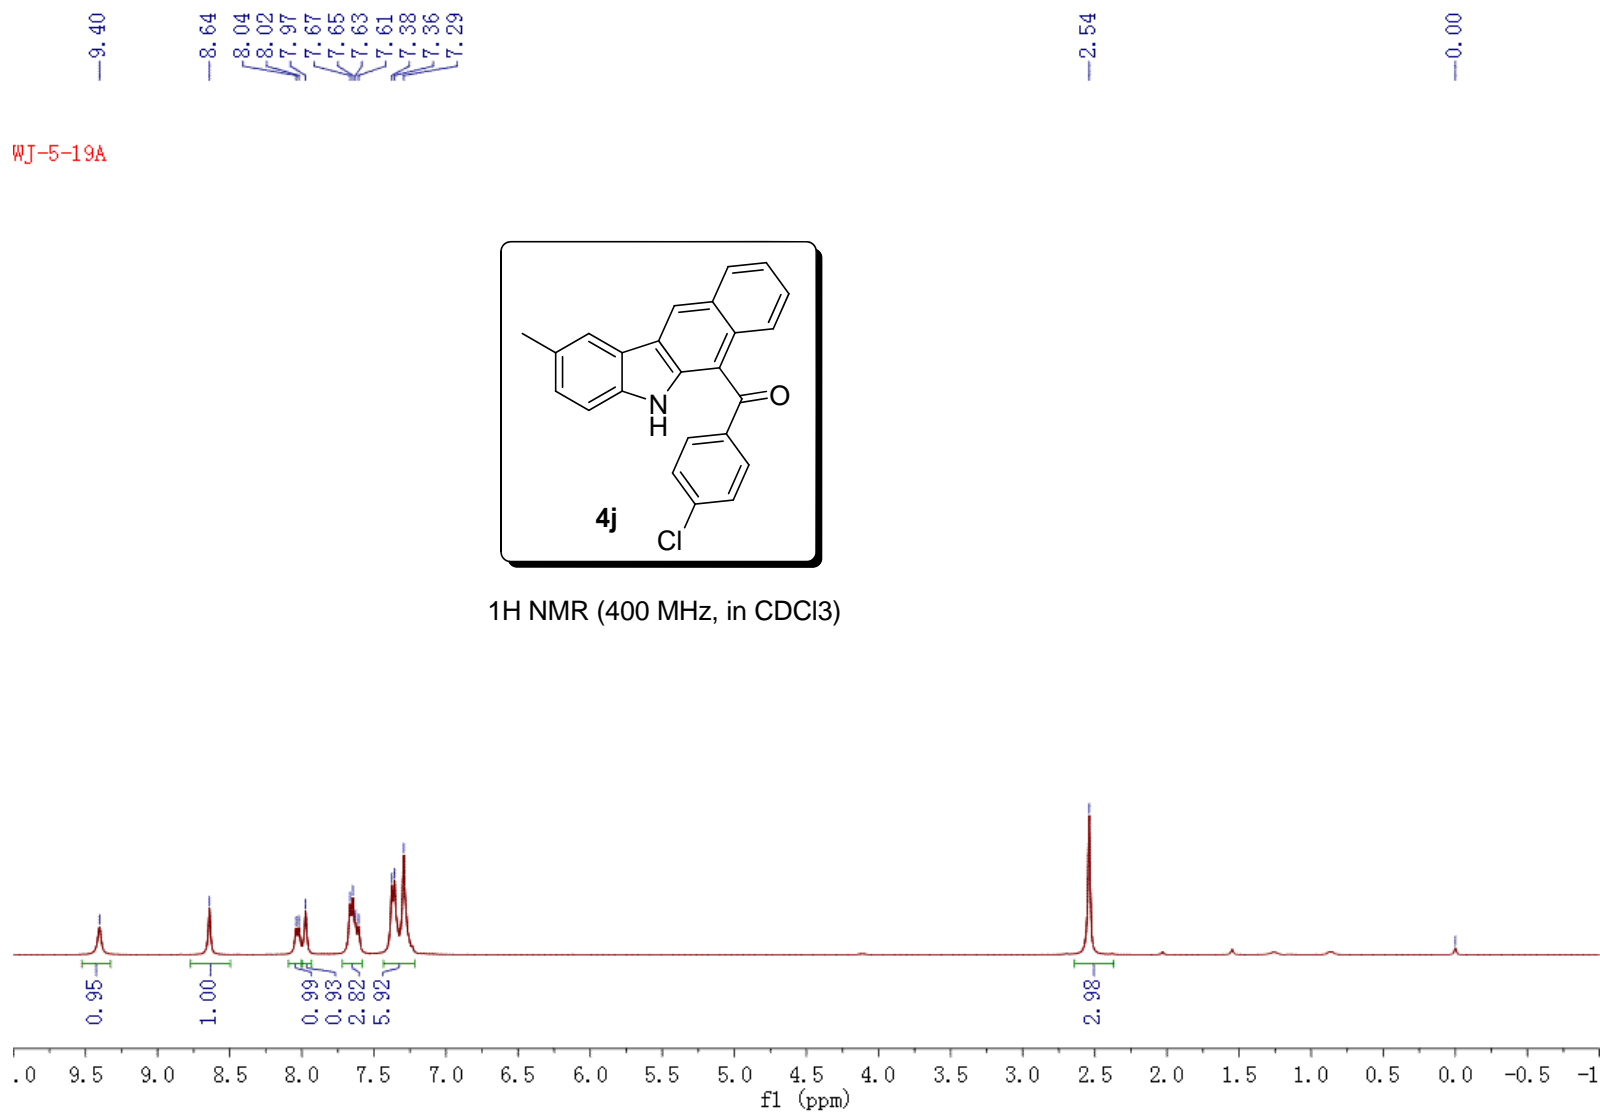

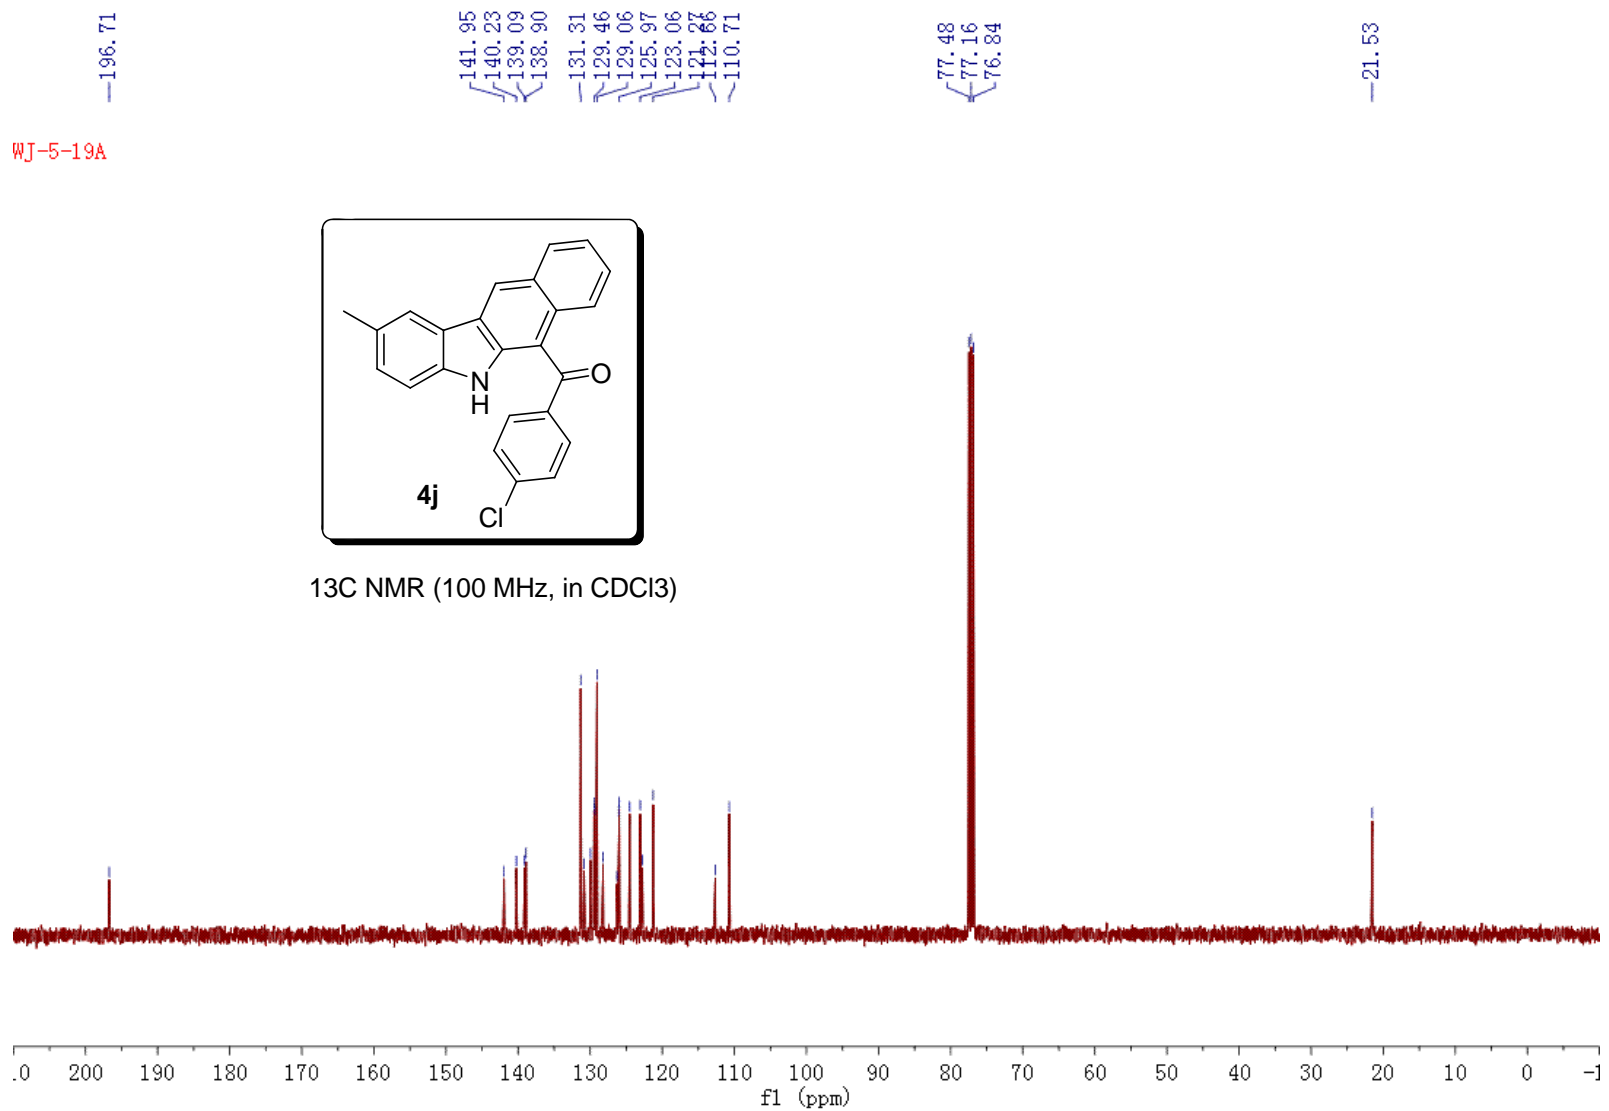

WJ-6-19B

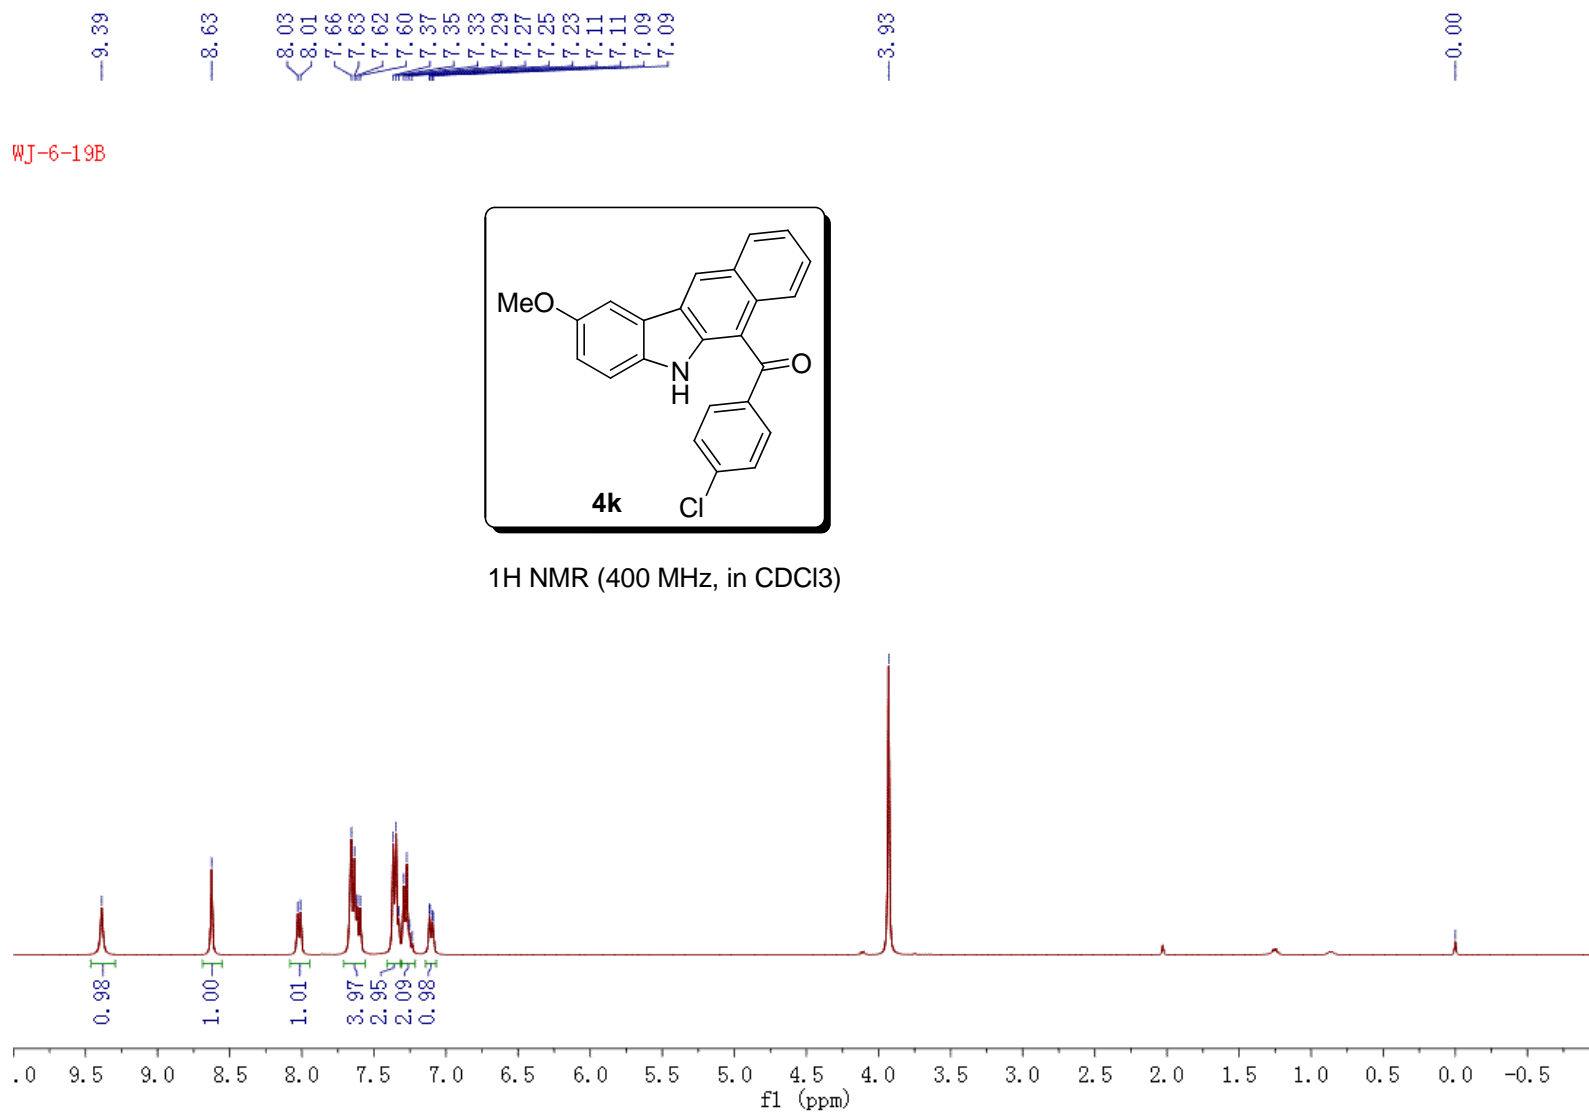

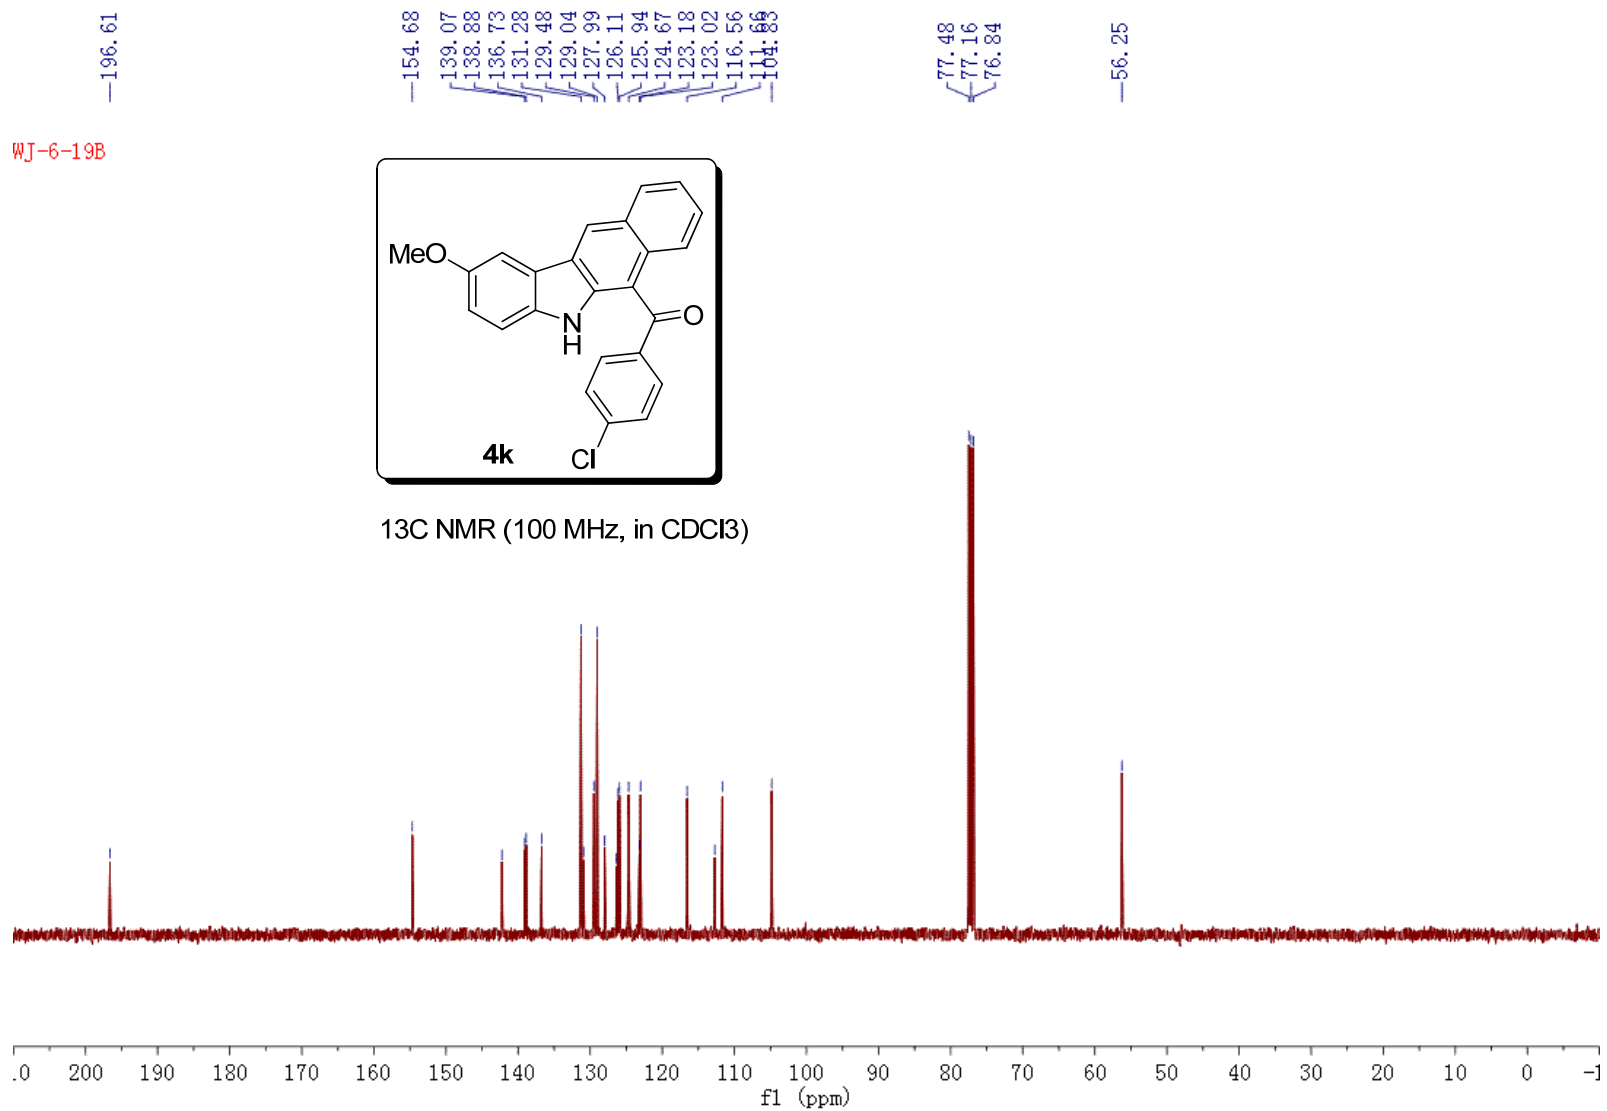

WJ-6-19D-7

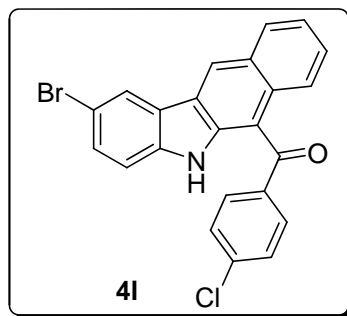

<sup>1</sup>H NMR (400 MHz, in DMSO)

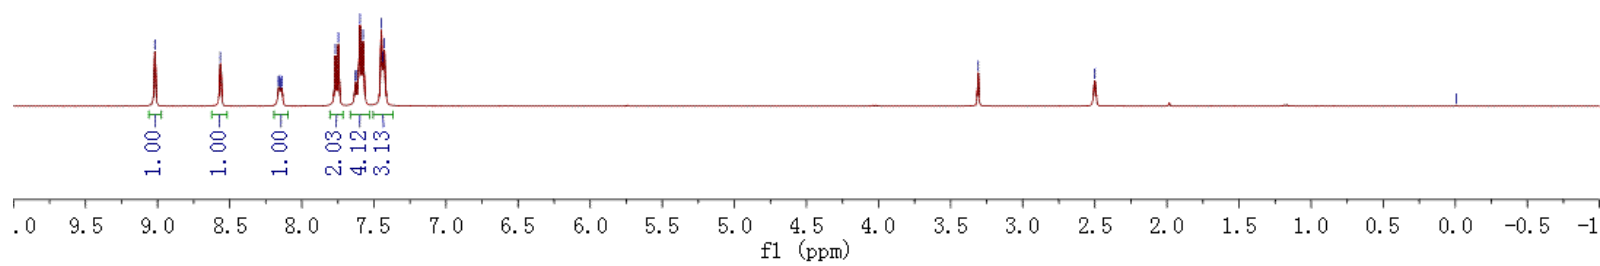



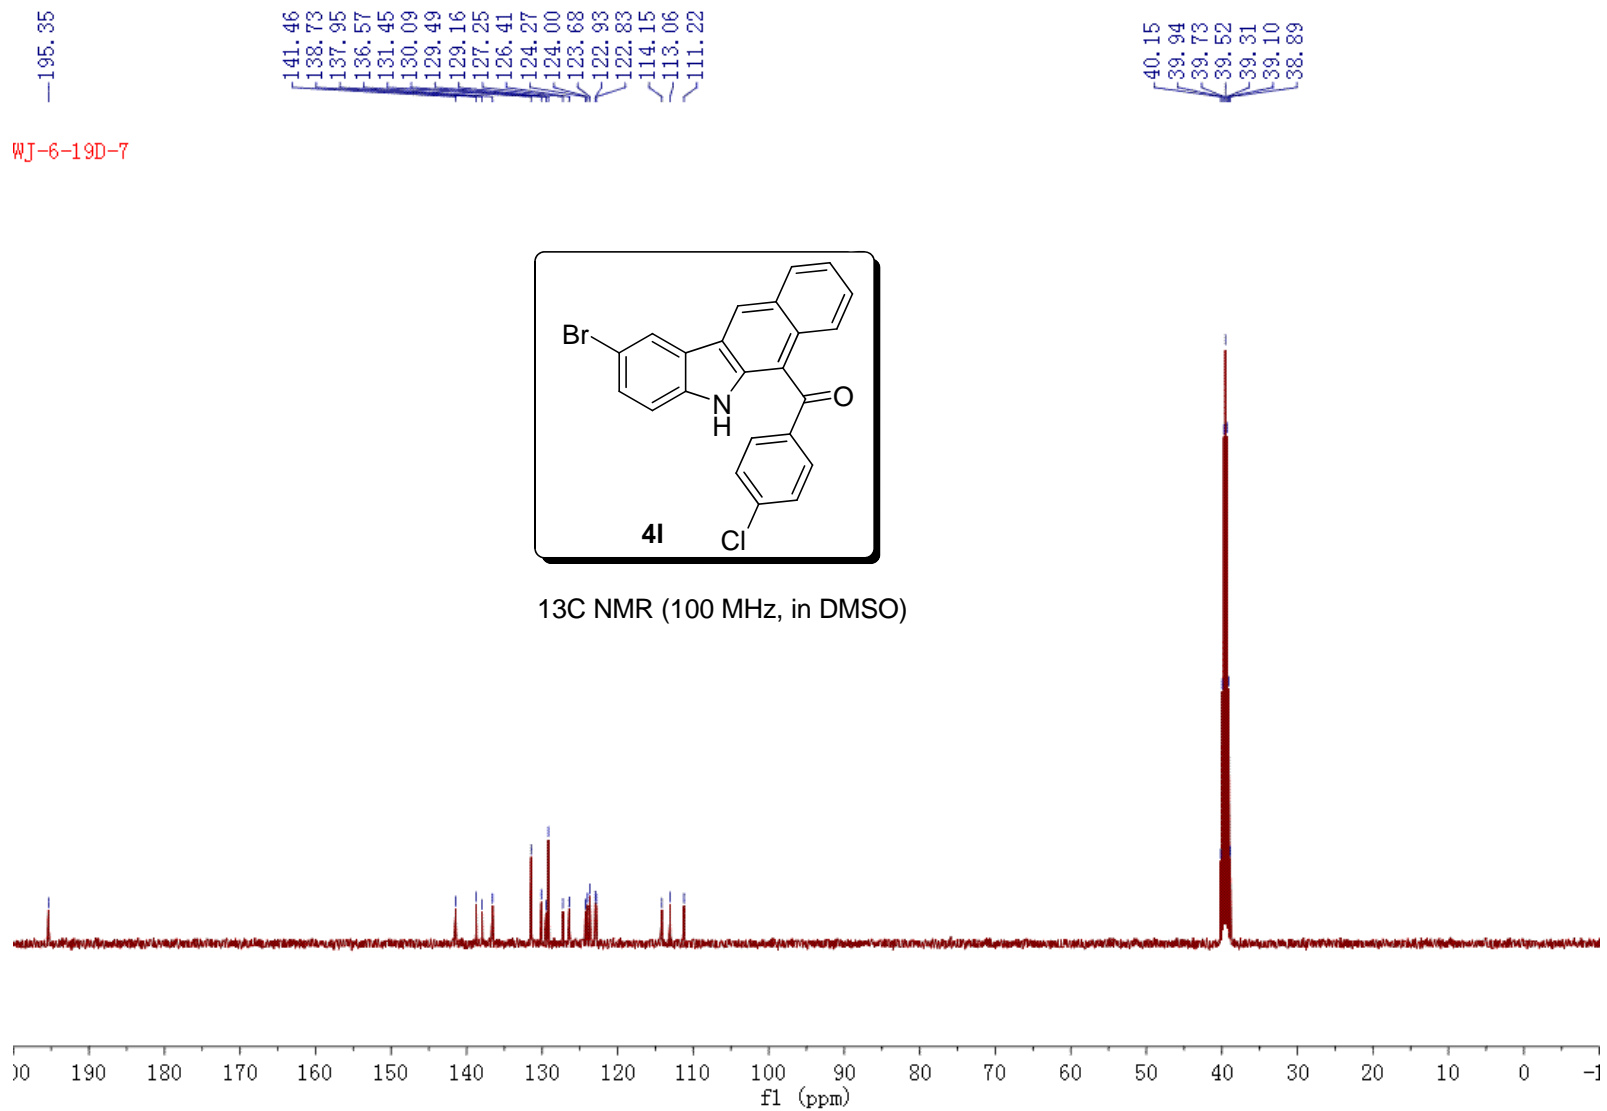

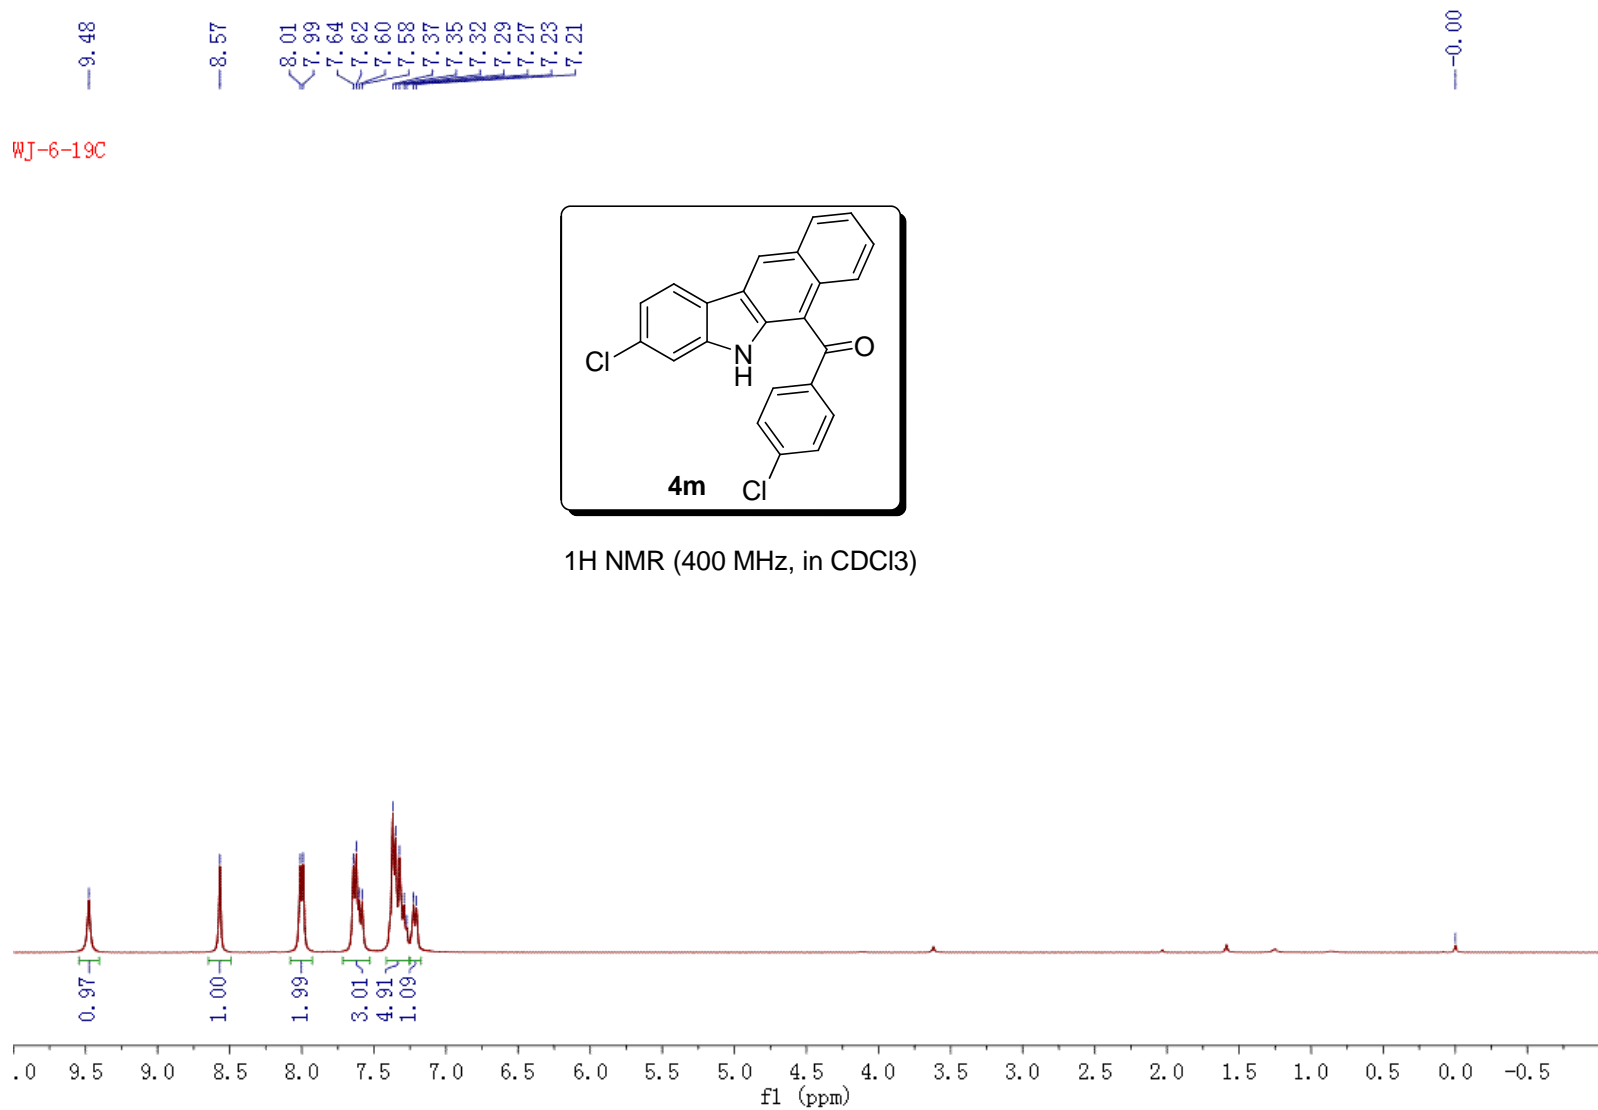

WJ-6-19C

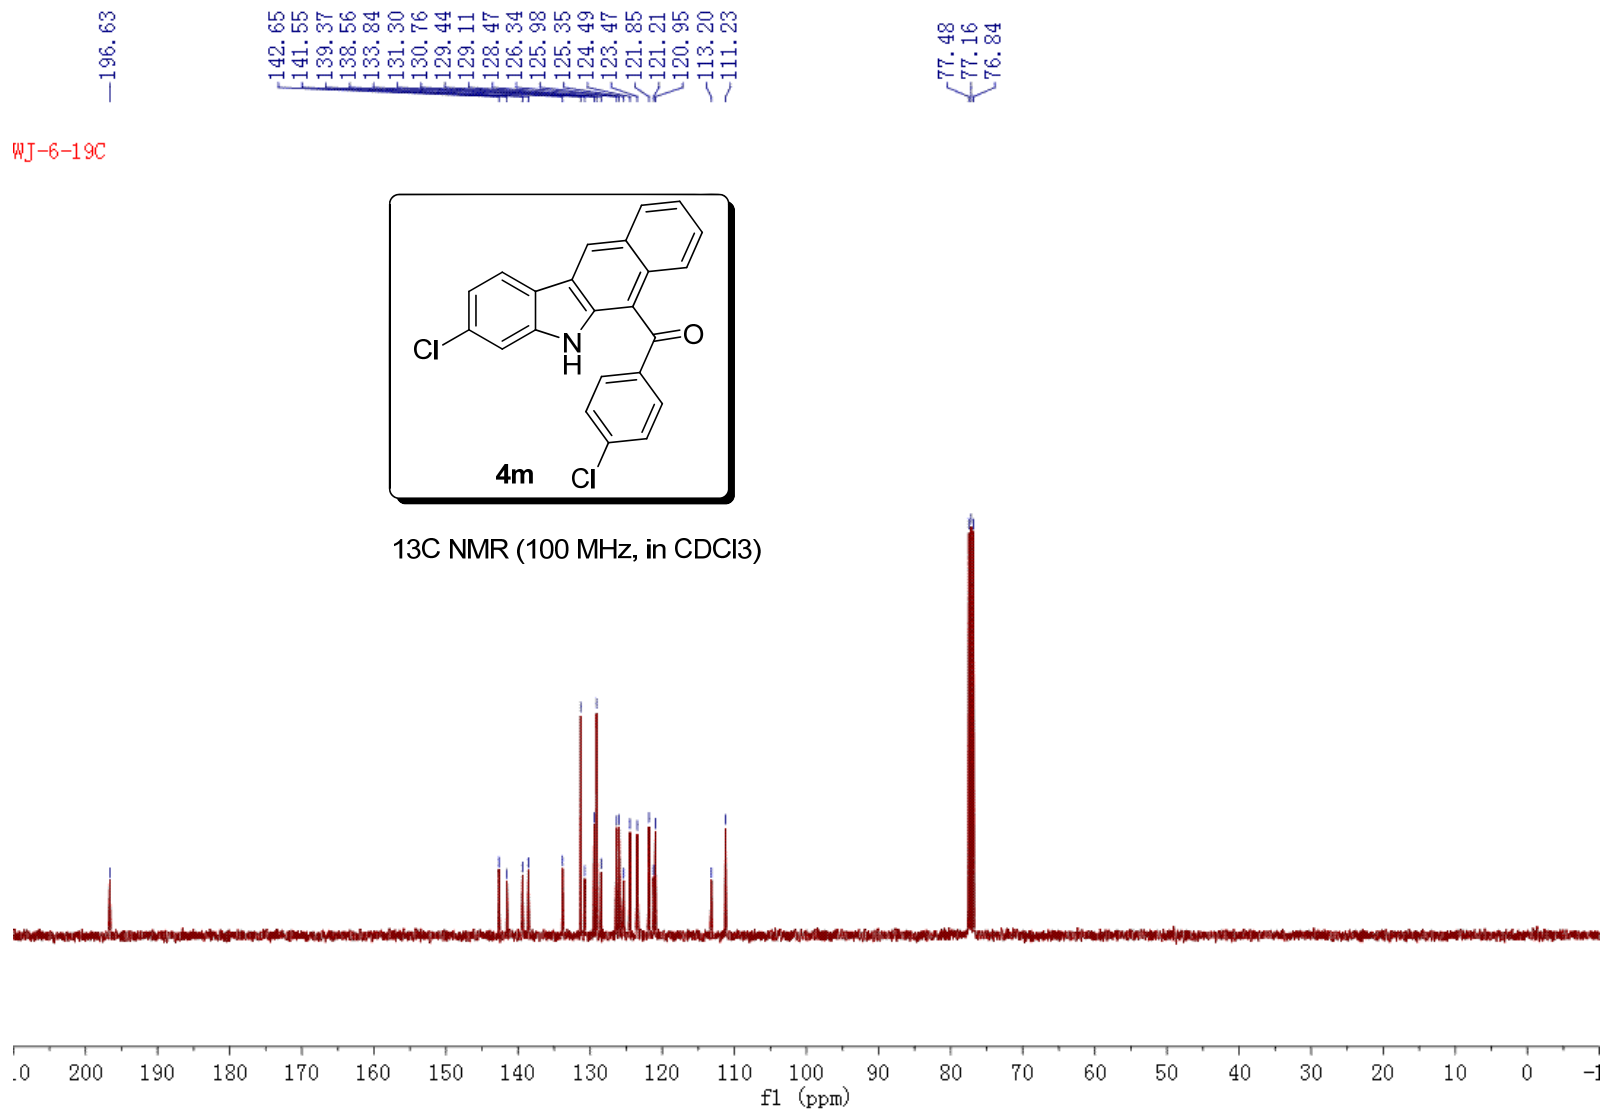

WJ-6-19F

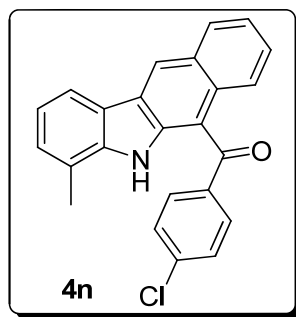

<sup>1</sup>H NMR (400 MHz, in CDCl<sub>3</sub>)

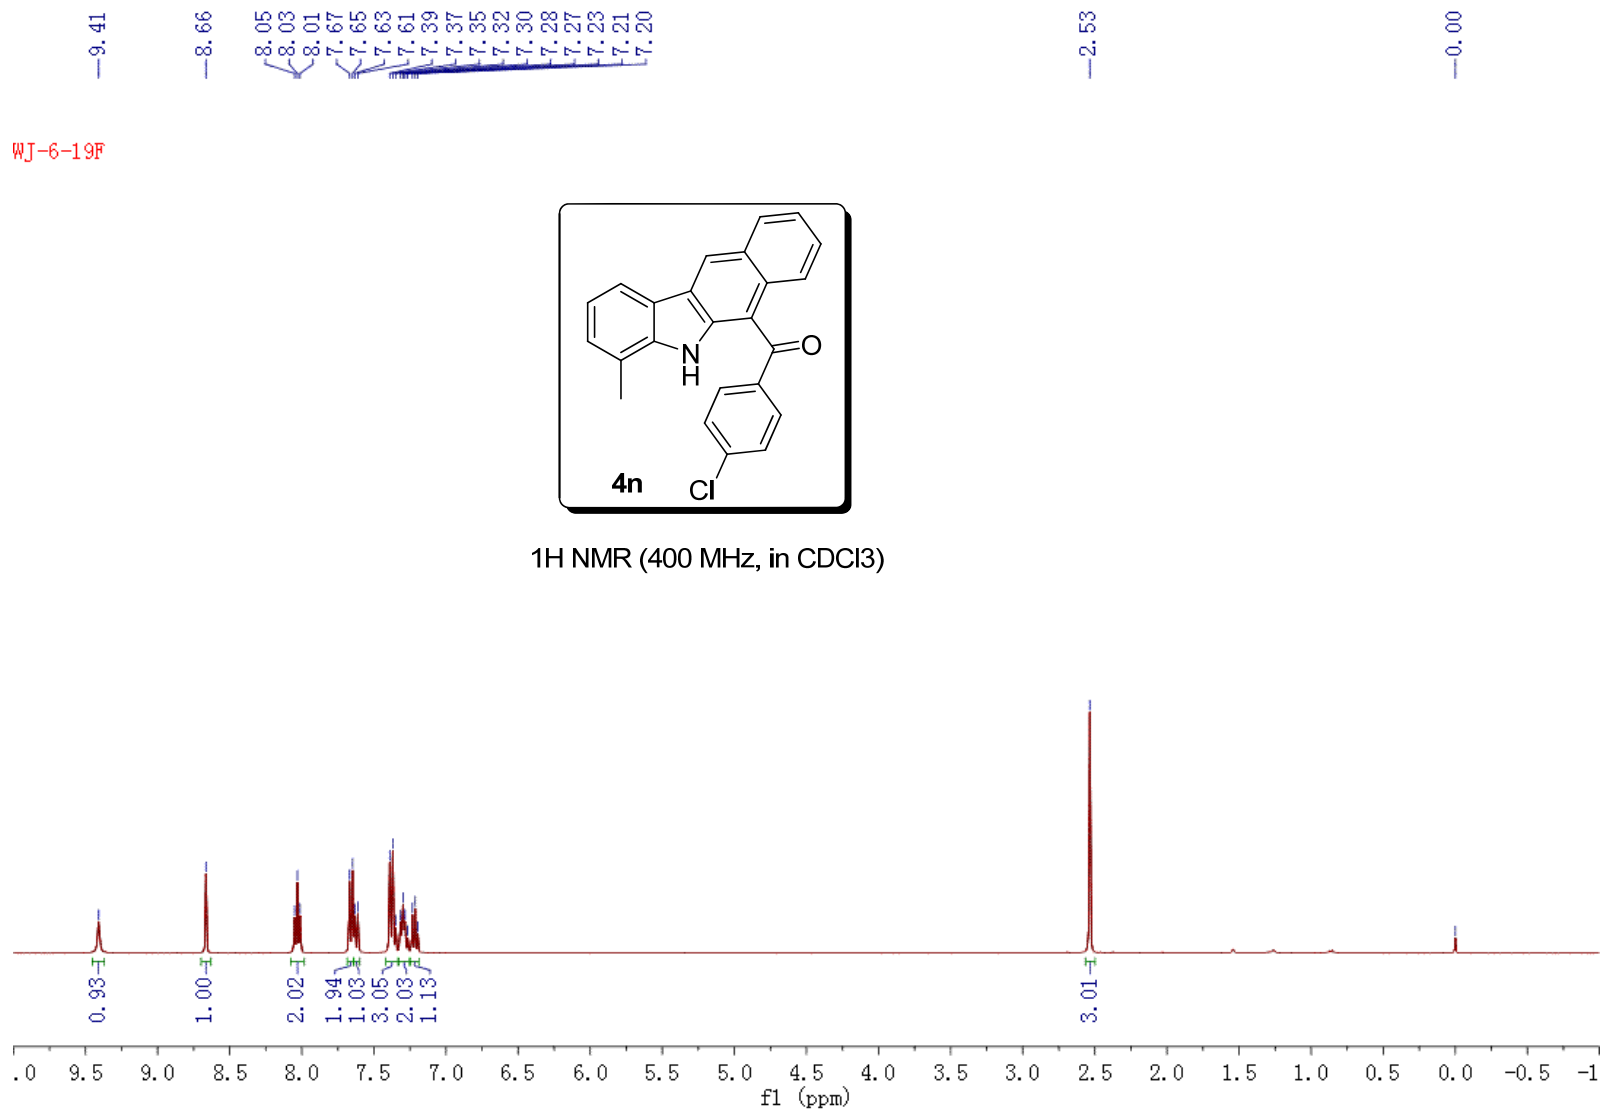

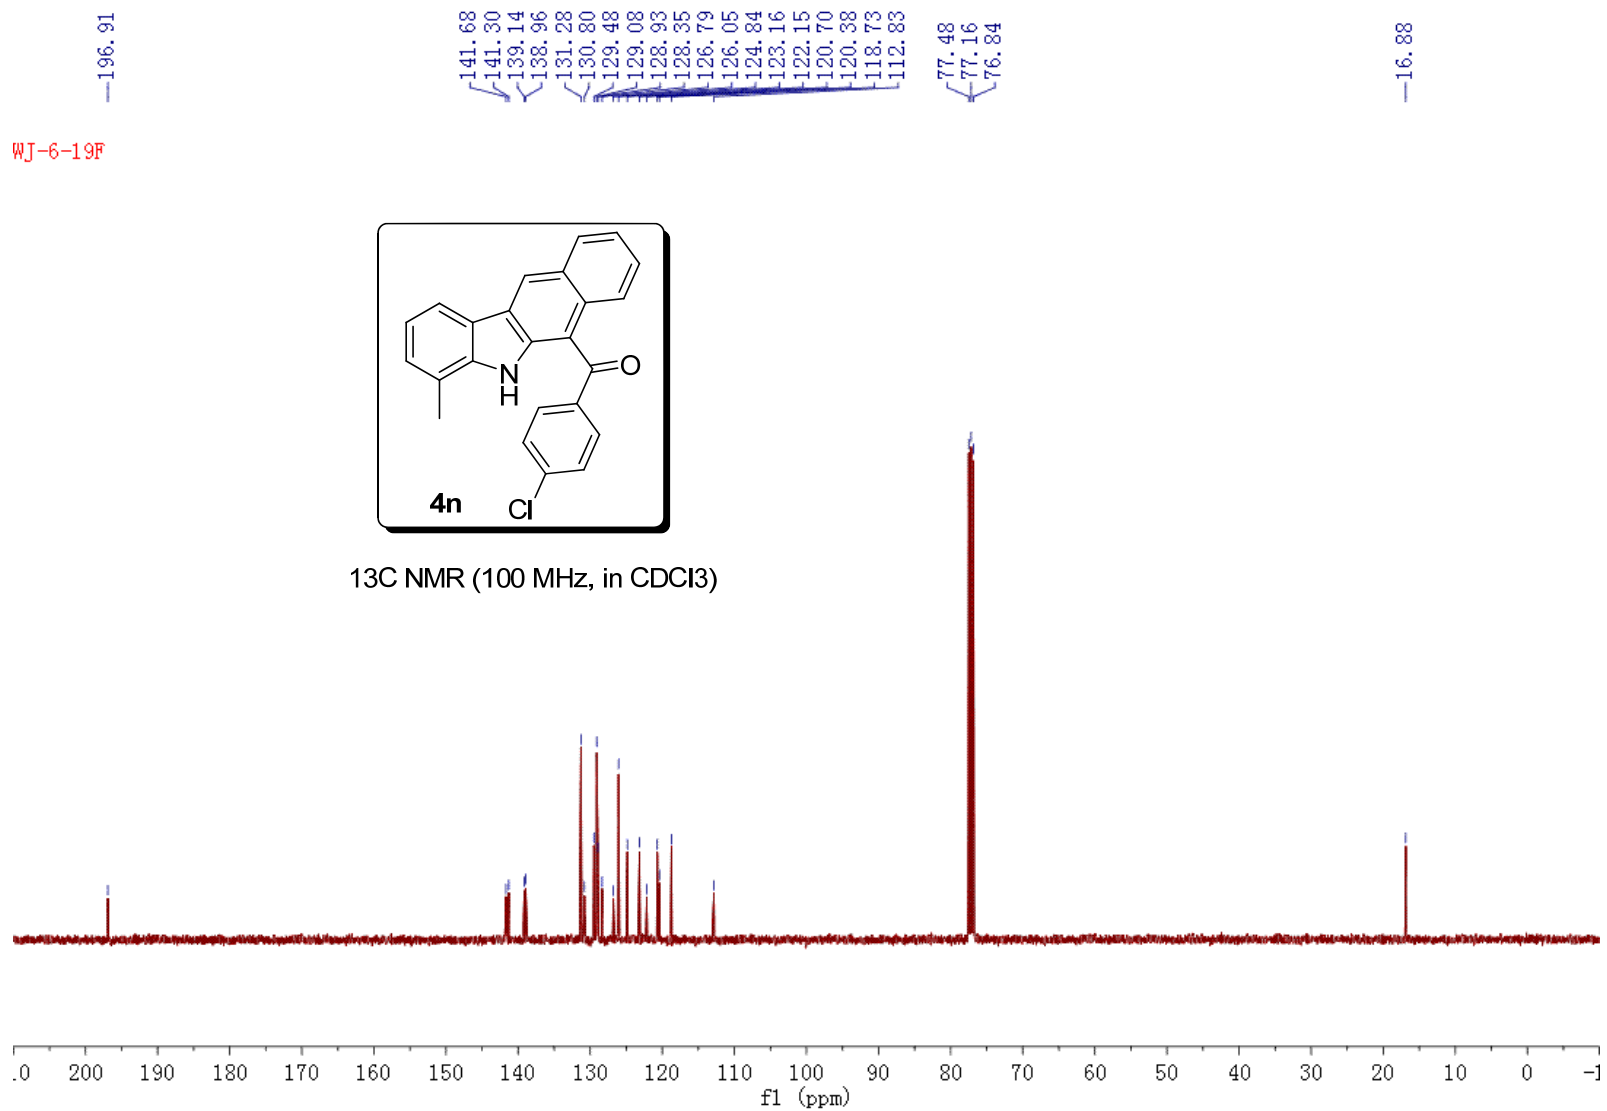

WJ-6-15I

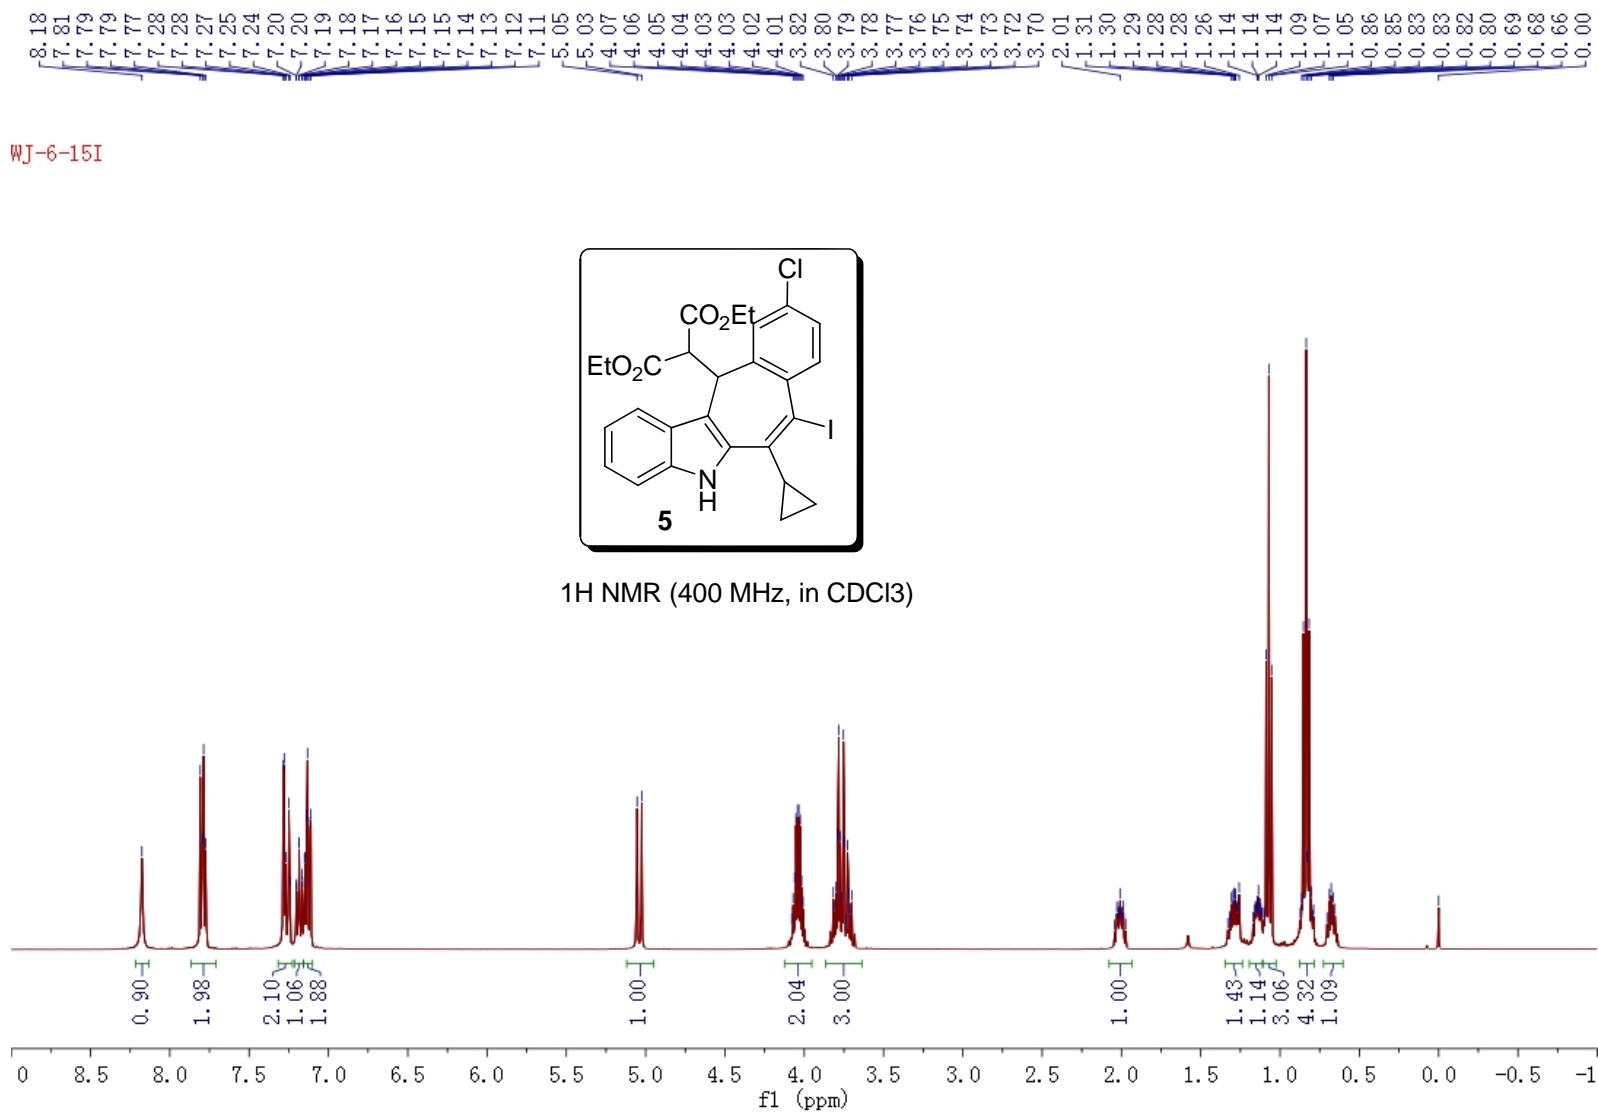

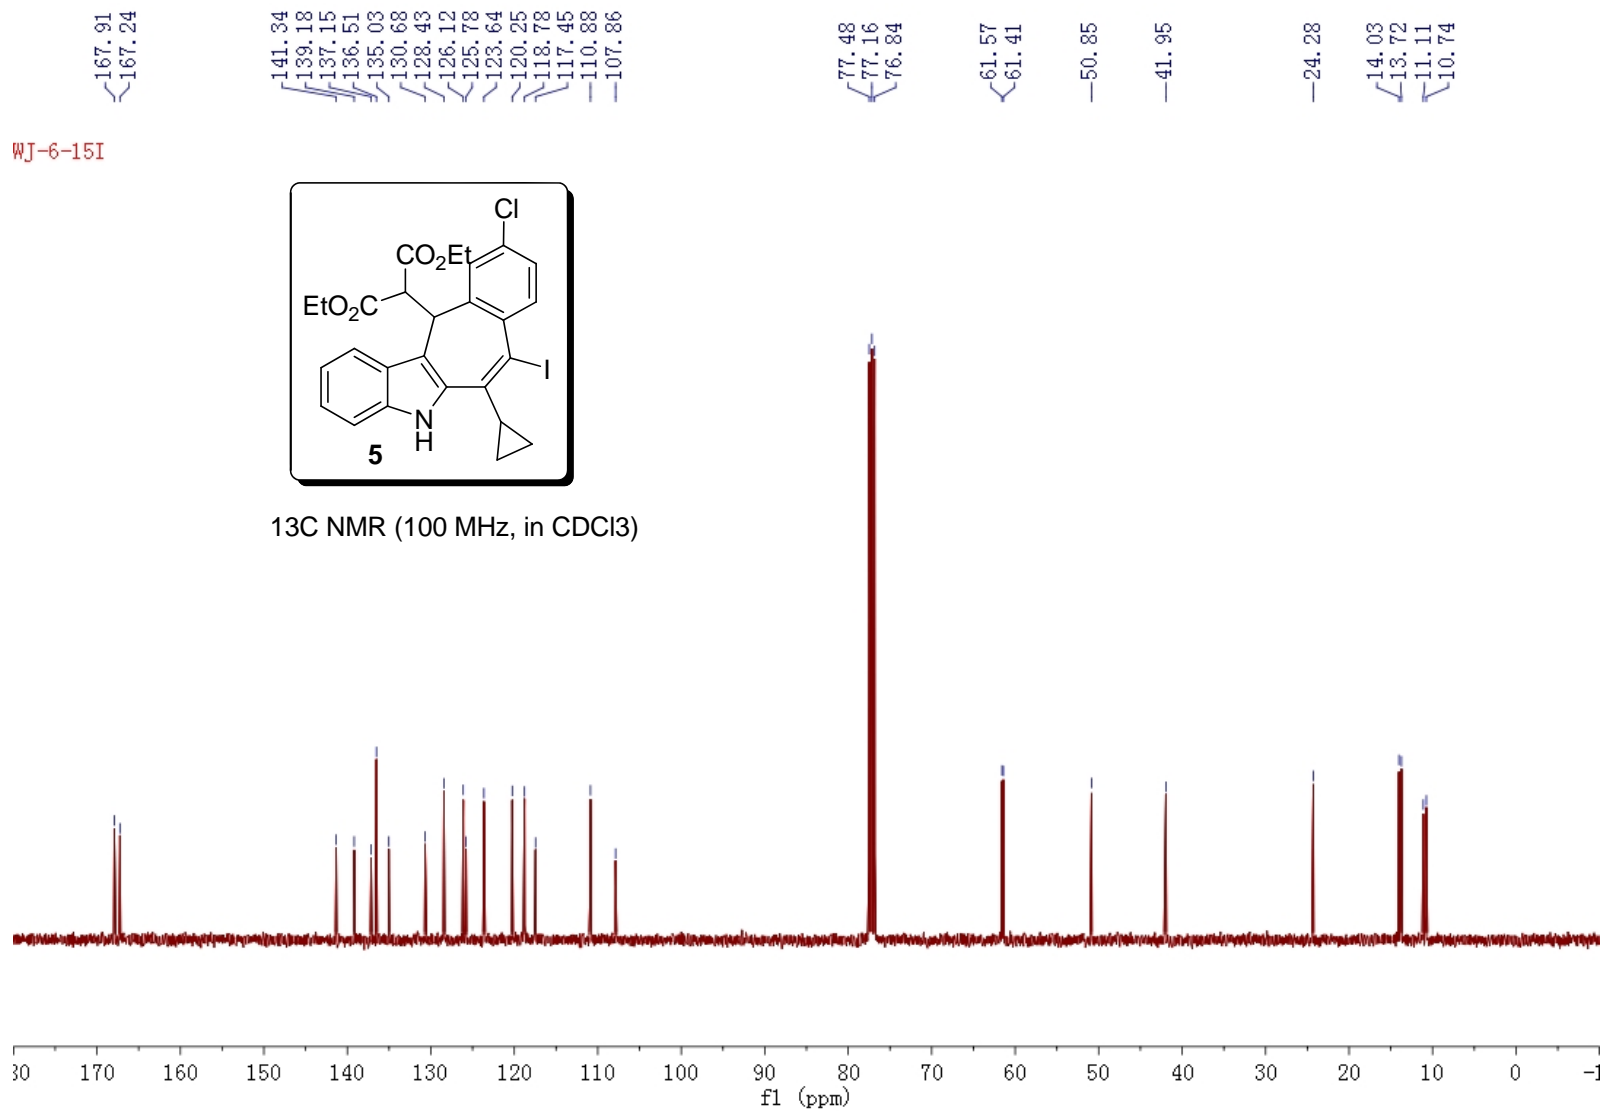

## 2. X-ray structure of **5**

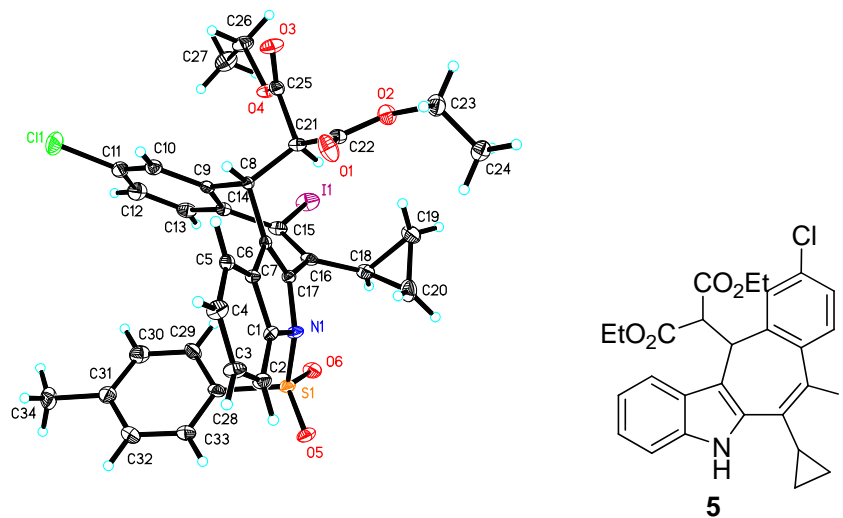

Table 1. Crystal data and structure refinement for mo\_dm14148\_0m.

|                      |                                                         |               |
|----------------------|---------------------------------------------------------|---------------|
| Identification code  | mo_dm14148_0m                                           |               |
| Empirical formula    | C <sub>34</sub> H <sub>31</sub> Cl I N O <sub>6</sub> S |               |
| Formula weight       | 744.01                                                  |               |
| Temperature          | 173(2) K                                                |               |
| Wavelength           | 0.71073 Å                                               |               |
| Crystal system       | Triclinic                                               |               |
| Space group          | P -1                                                    |               |
| Unit cell dimensions | a = 8.380(3) Å                                          | = 87.992(7)°. |
| b = 9.942(4) Å       | = 88.509(7)°                                            |               |



|                                   |                                             |
|-----------------------------------|---------------------------------------------|
| c = 19.911(7) Å                   | = 72.843(7)°.                               |
| Volume                            | 1583.7(10) Å <sup>3</sup>                   |
| Z                                 | 2                                           |
| Density (calculated)              | 1.560 Mg/m <sup>3</sup>                     |
| Absorption coefficient            | 1.208 mm <sup>-1</sup>                      |
| F(000)                            | 752                                         |
| Crystal size                      | 0.250 x 0.120 x 0.080 mm <sup>3</sup>       |
| Theta range for data collection   | 1.023 to 30.278°.                           |
| Index ranges                      | -11<=h<=11, -13<=k<=13, -28<=l<=27          |
| Reflections collected             | 15285                                       |
| Independent reflections           | 9191 [R(int) = 0.0369]                      |
| Completeness to theta = 25.242°   | 99.3 %                                      |
| Absorption correction             | Semi-empirical from equivalents             |
| Max. and min. transmission        | 0.7461 and 0.6639                           |
| Refinement method                 | Full-matrix least-squares on F <sup>2</sup> |
| Data / restraints / parameters    | 9191 / 0 / 397                              |
| Goodness-of-fit on F <sup>2</sup> | 1.002                                       |
| Final R indices [I>2sigma(I)]     | R1 = 0.0499, wR2 = 0.1329                   |

|                             |                                    |
|-----------------------------|------------------------------------|
| R indices (all data)        | R1 = 0.0893, wR2 = 0.1837          |
| Extinction coefficient      | n/a                                |
| Largest diff. peak and hole | 0.694 and -0.799 e.Å <sup>-3</sup> |

CCDC 992632 (5) contain the supplementary crystallographic data for this paper. These data can be obtained free of charge from The Cambridge Crystallographic Data Centre via [www.ccdc.cam.ac.uk/data\\_request/cif](http://www.ccdc.cam.ac.uk/data_request/cif).

### 3. TIC spectrum and MS spectrum of five substances with molecule weight of 591.1

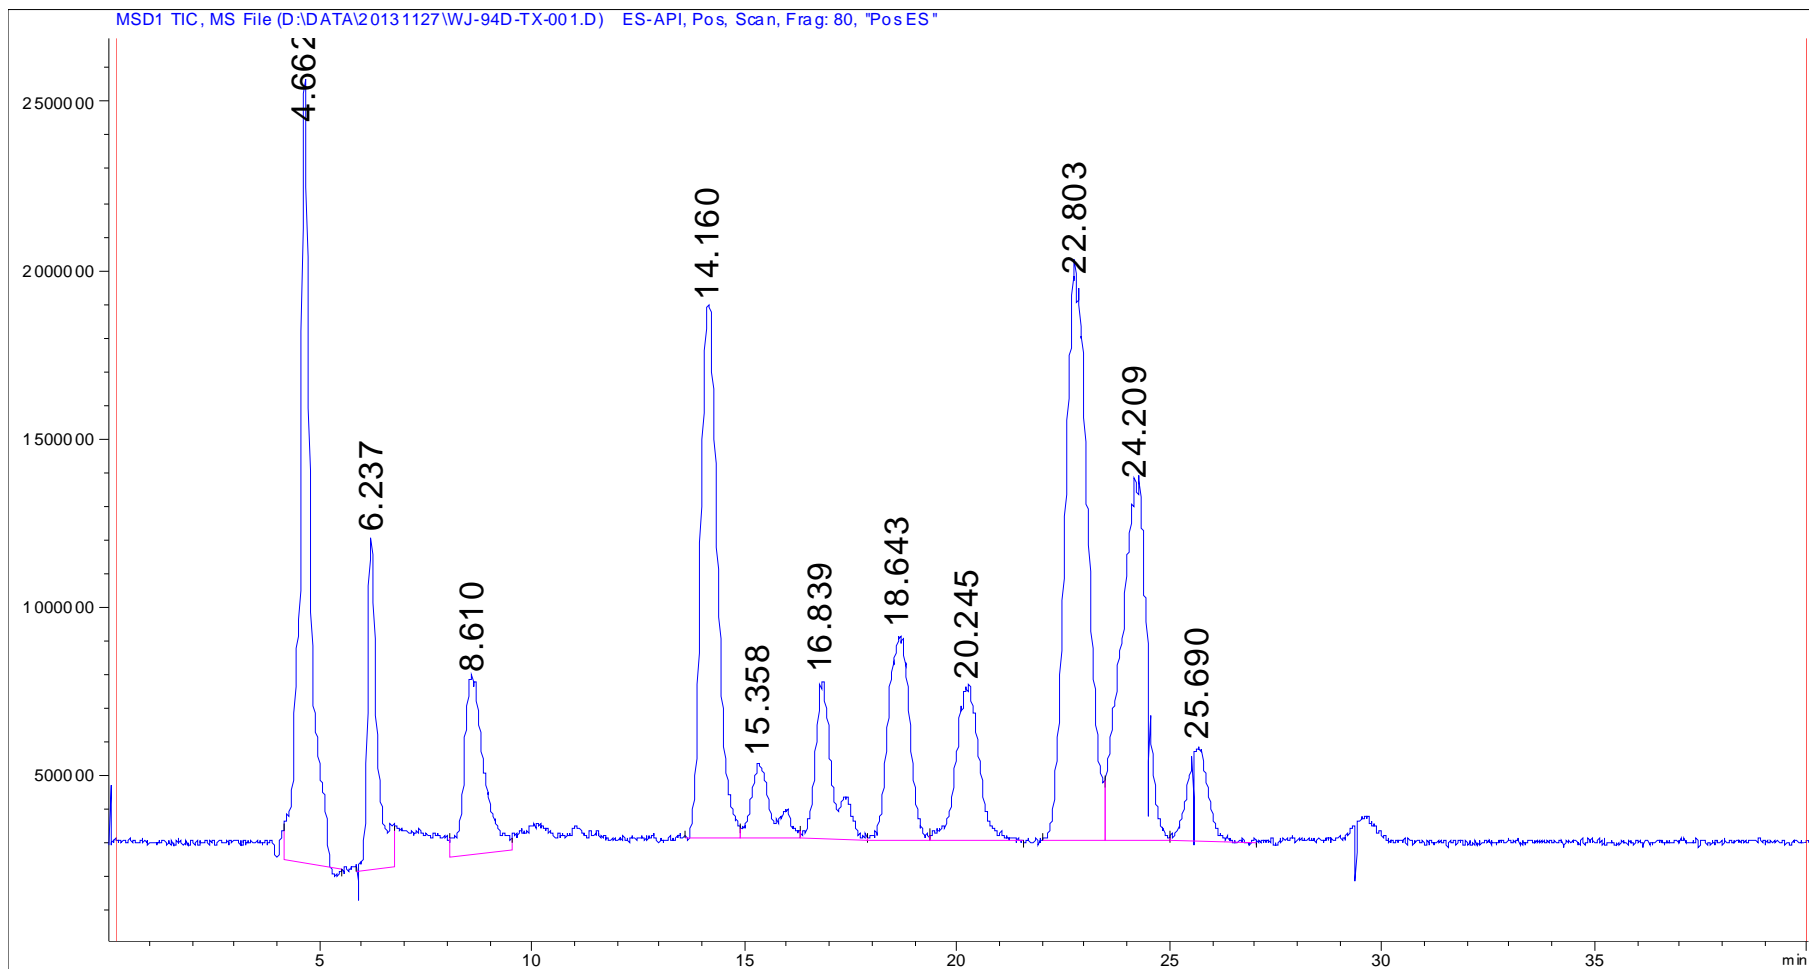

\*MSD1 SPC, time=16.806:17.024 of D:\DATA\20131127WJ-94D-TX-001.D ES-API, Pos, Scan, Frag: 80, "Pos ES"

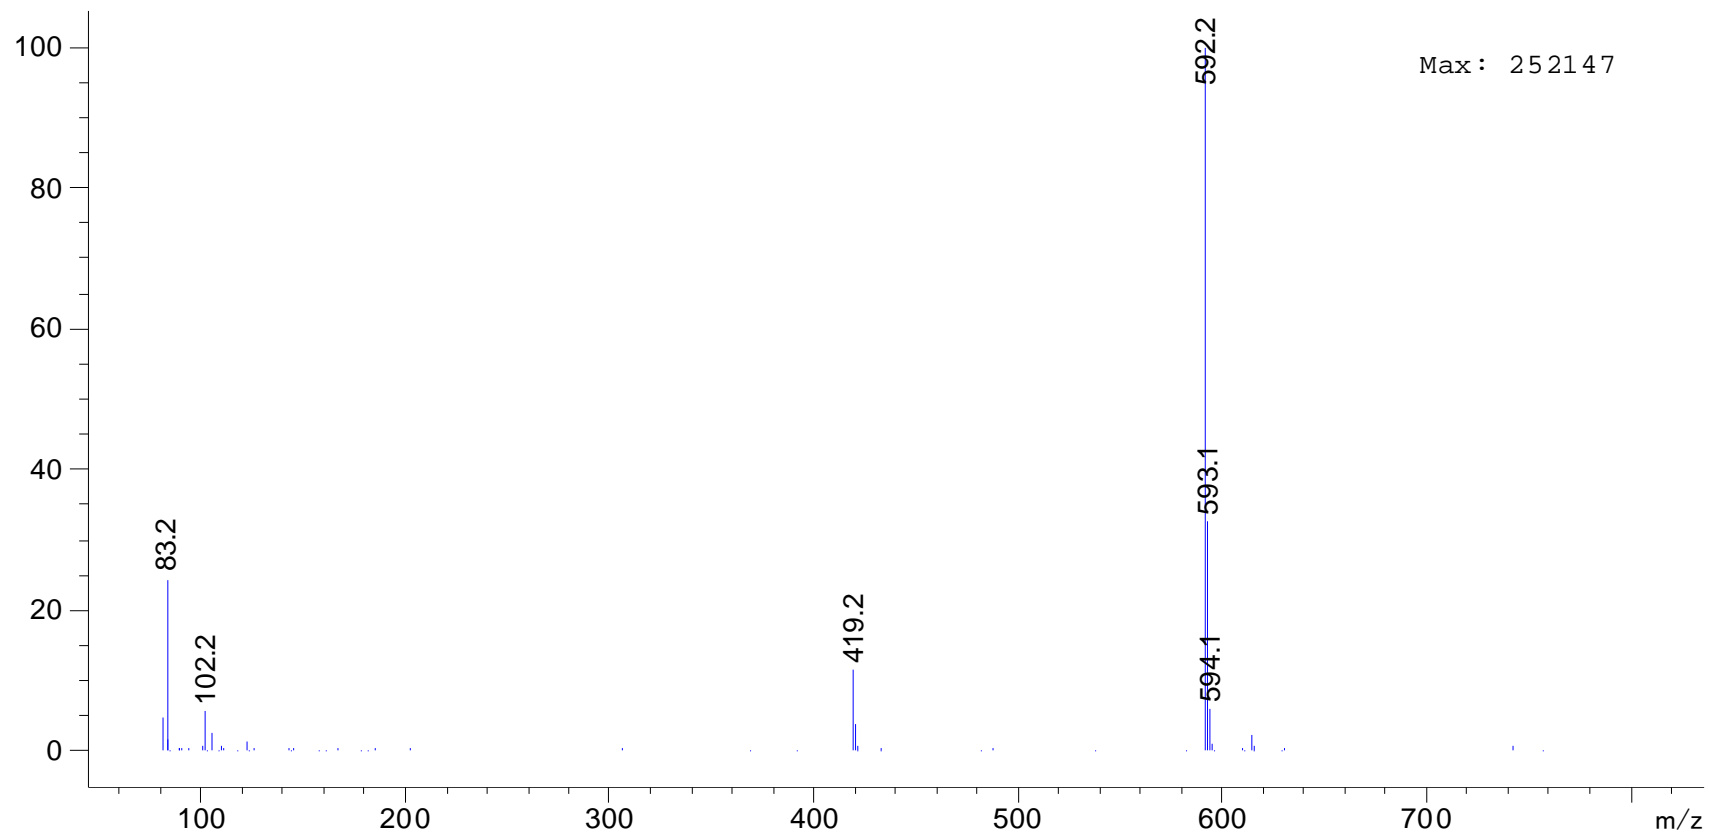

\*MSD1 SPC, time=19.987:20.767 of D:\DATA\20131127WJ-94D-TX-001.D ES-API, Pos, Scan, Frag: 80, "Pos ES"

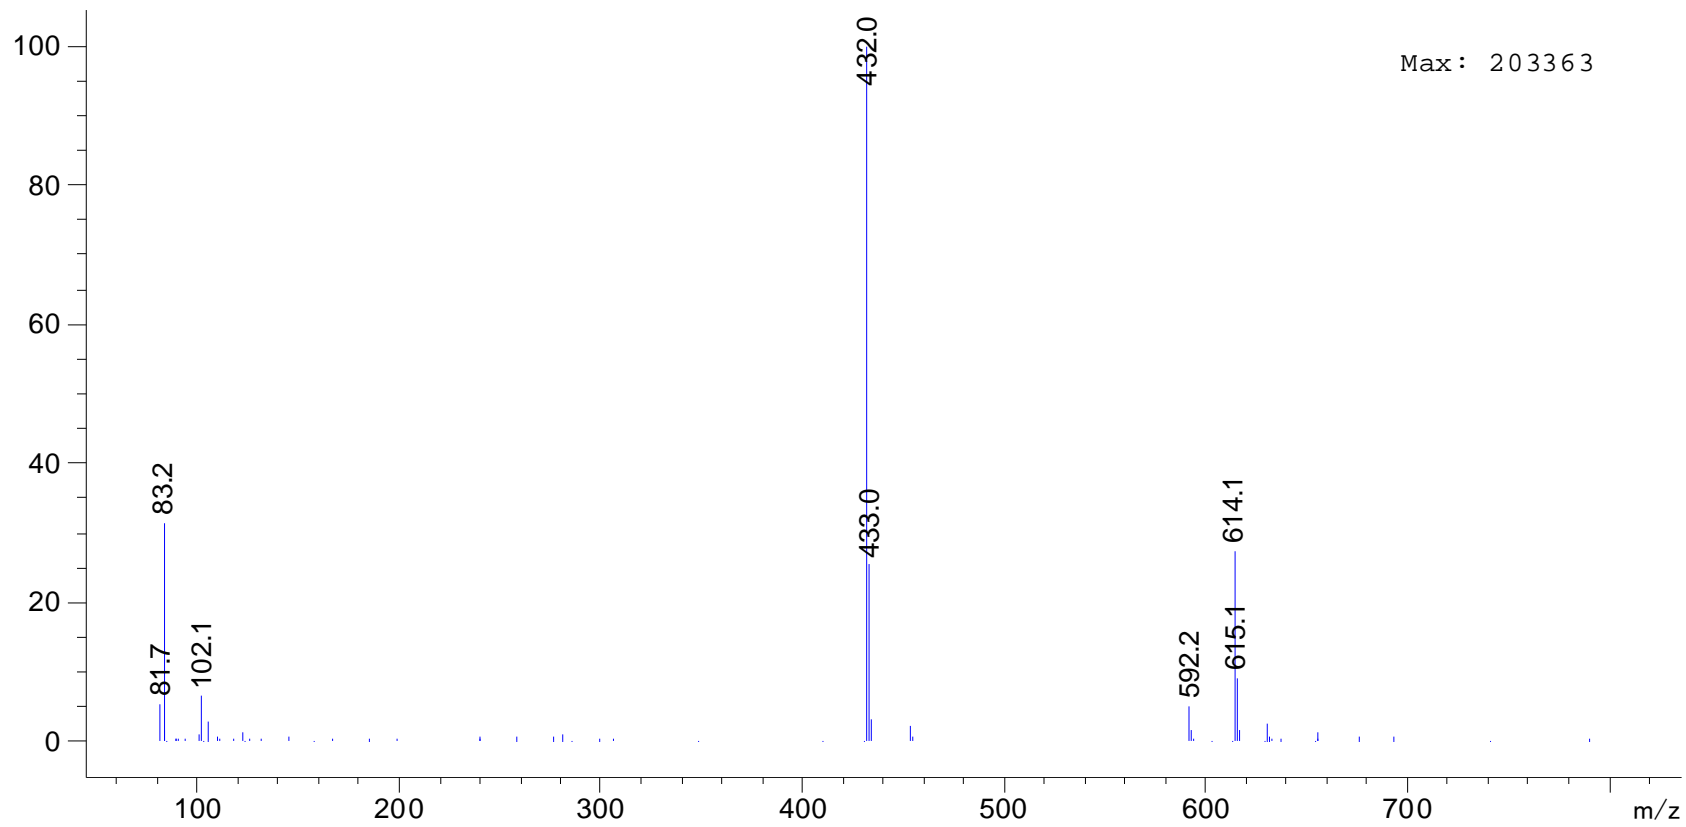

\*MSD1 SPC, time=22.483:22.998 of D:\DATA\20131127WJ-94D-TX-001.D ES-API, Pos, Scan, Frag: 80, "Pos ES"

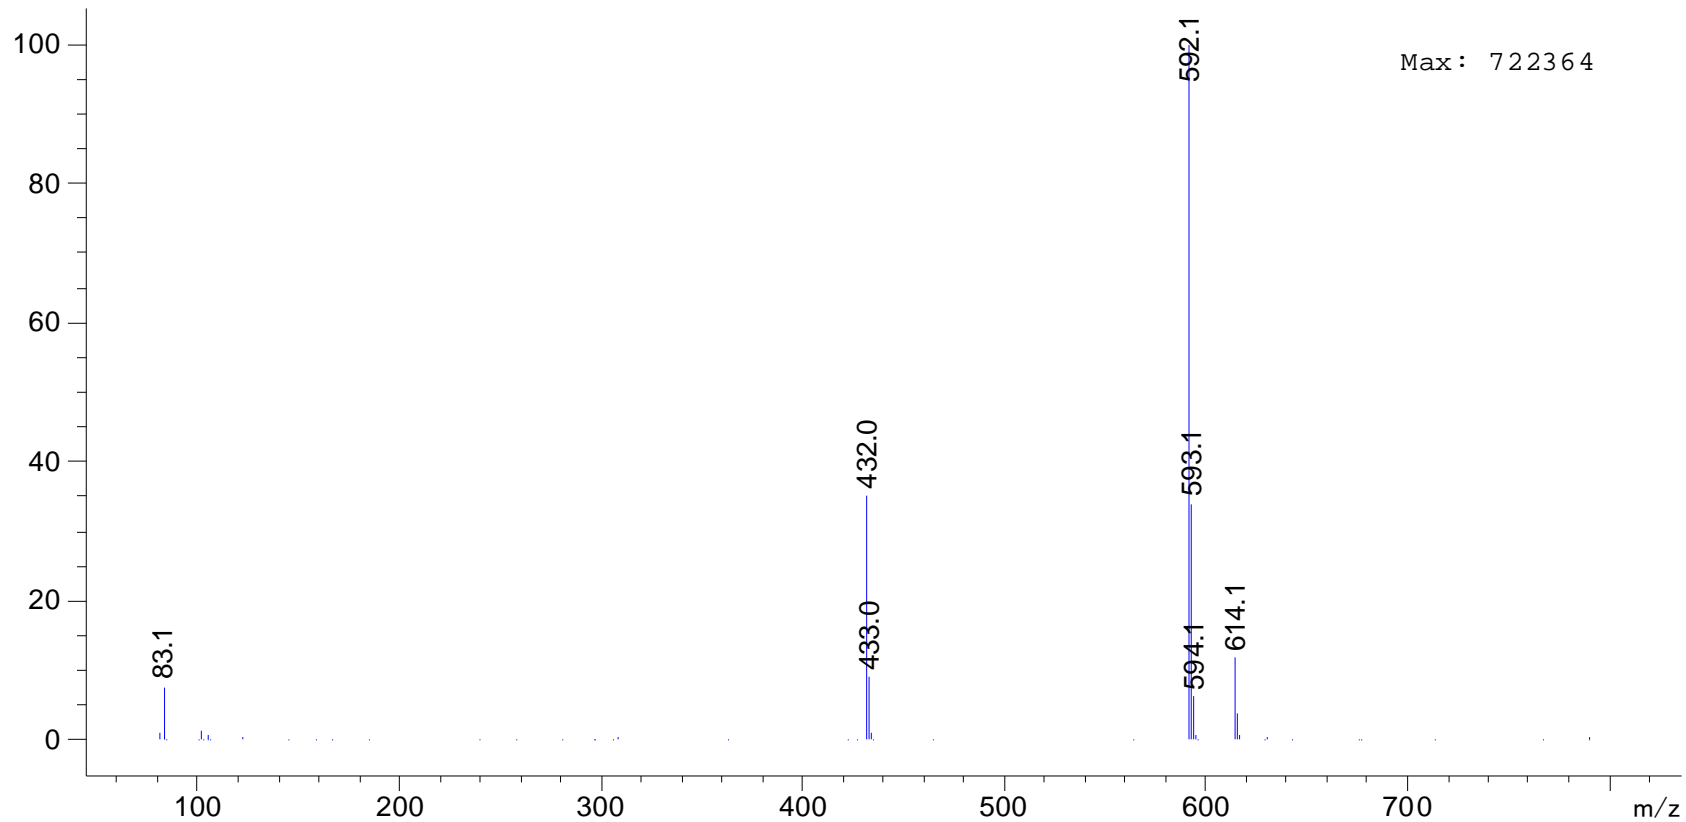

\*MSD1 SPC, time=23.809:24.370 of D:\DATA\20131127WJ-94D-TX-001.D ES-API, Pos, Scan, Frag: 80, "Pos ES"

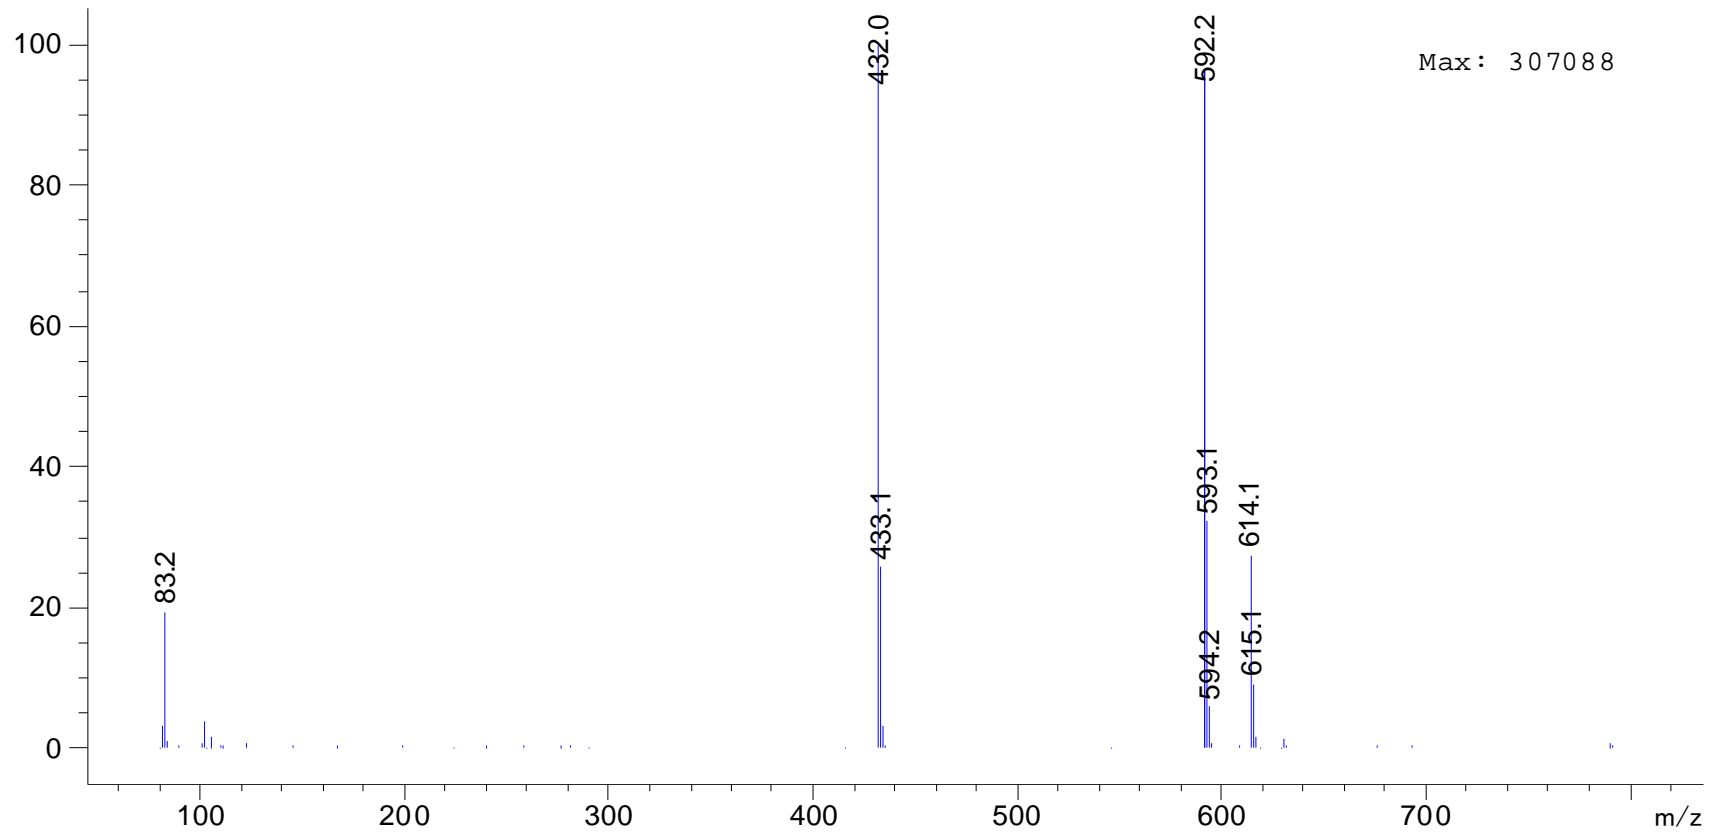

\*MSD1 SPC, time=25.322:25.883 of D:\DATA\20131127WJ-94D-TX-001.D ES-API, Pos, Scan, Frag: 80, "Pos ES"

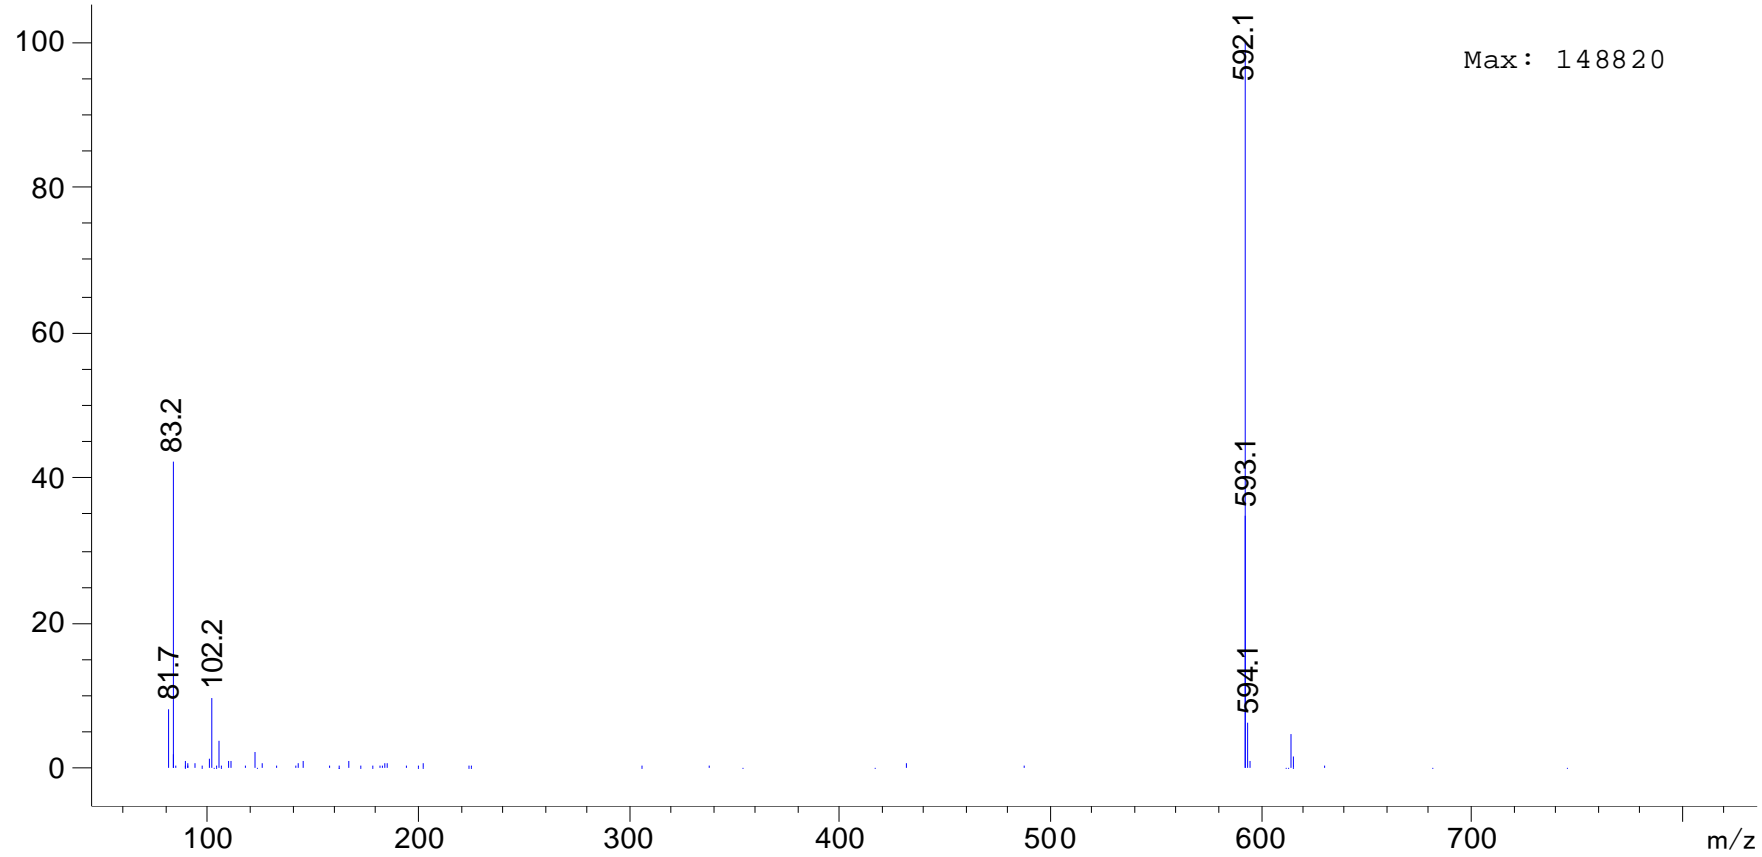

Supplement: c4ob00815d1.pdf [file c4ob00815d1.pdf]
